# Supplementary material for: Phospholipid oxidation generates potent anti-inflammatory lipid mediators that mimic structurally related pro-resolving eicosanoids by activating Nrf2
Source: PubMed Central journal article supplement (PMC4492819; doi:10.15252/emmm.201404702), 2015-03-13
Supplement: emmm0007-0593-sd1.pdf [file emmm0007-0593-sd1.pdf]

**Phospholipid oxidation generates potent anti-inflammatory lipid mediators that mimic structurally related pro-resolving eicosanoids by activating Nrf2**

Peter Bretscher, Julian Egger, Abdijapar Shamshiev, Martin Trötzmüller, Harald Köfeler, Erick M. Carreira, Manfred Kopf, and Stefan Freigang

**Supplementary information**

## Table of contents

**Supplementary Figure S1.** Anti-inflammatory bioactivity of OxPL and epoxycyclopentenone lipids is not caused by toxicity.

**Supplementary Figure S2.** Anti-inflammatory bioactivity of OxPL and epoxycyclopentenone lipids is not caused by toxicity.

**Supplementary Figure S3.** Enhanced inflammatory cytokine and chemokine responses of Nrf2-deficient as compared to wild type BMDC.

**Supplementary Figure S4.** Epoxycyclopentenone-containing OxPL induce Nrf2-mediated gene expression in vivo.

**Supplementary Figure S5.** The anti-inflammatory effect of OxPAPC is restricted to cyclopentenone-containing lipid mediators.

**Supplementary Figure S6.** The induction of Nrf2-signaling is restricted to cyclopentenone-containing lipid mediators.

**Supplementary Figure S7.** Epoxycyclopentenone lipids negatively regulate the expression of multiple cytokines.

**Supplementary Figure S8 and supplementary method.** High resolution mass chromatogram of  $m/z$  666.397  $\pm$  0.005 (upper panel) and low energy LTQ CID spectrum of P-HODiA-PC at  $m/z$  666.4 and a retention time of 4.90 min (lower panel).

**Supplementary Figure S9.** Effect of solubilization on the bioactivity of the cyclopentenone lipid 15d-PGJ2.

**Supplementary Figure S10.** Expression of housekeeping genes and absence of ER stress in cyclopentenone-stimulated cells.

**Supplementary Figure Legends.**

**Supplementary Table 1.** Sets of primers used for quantitative PCR in this study.

**Supplementary Table 2.** Exact p values.

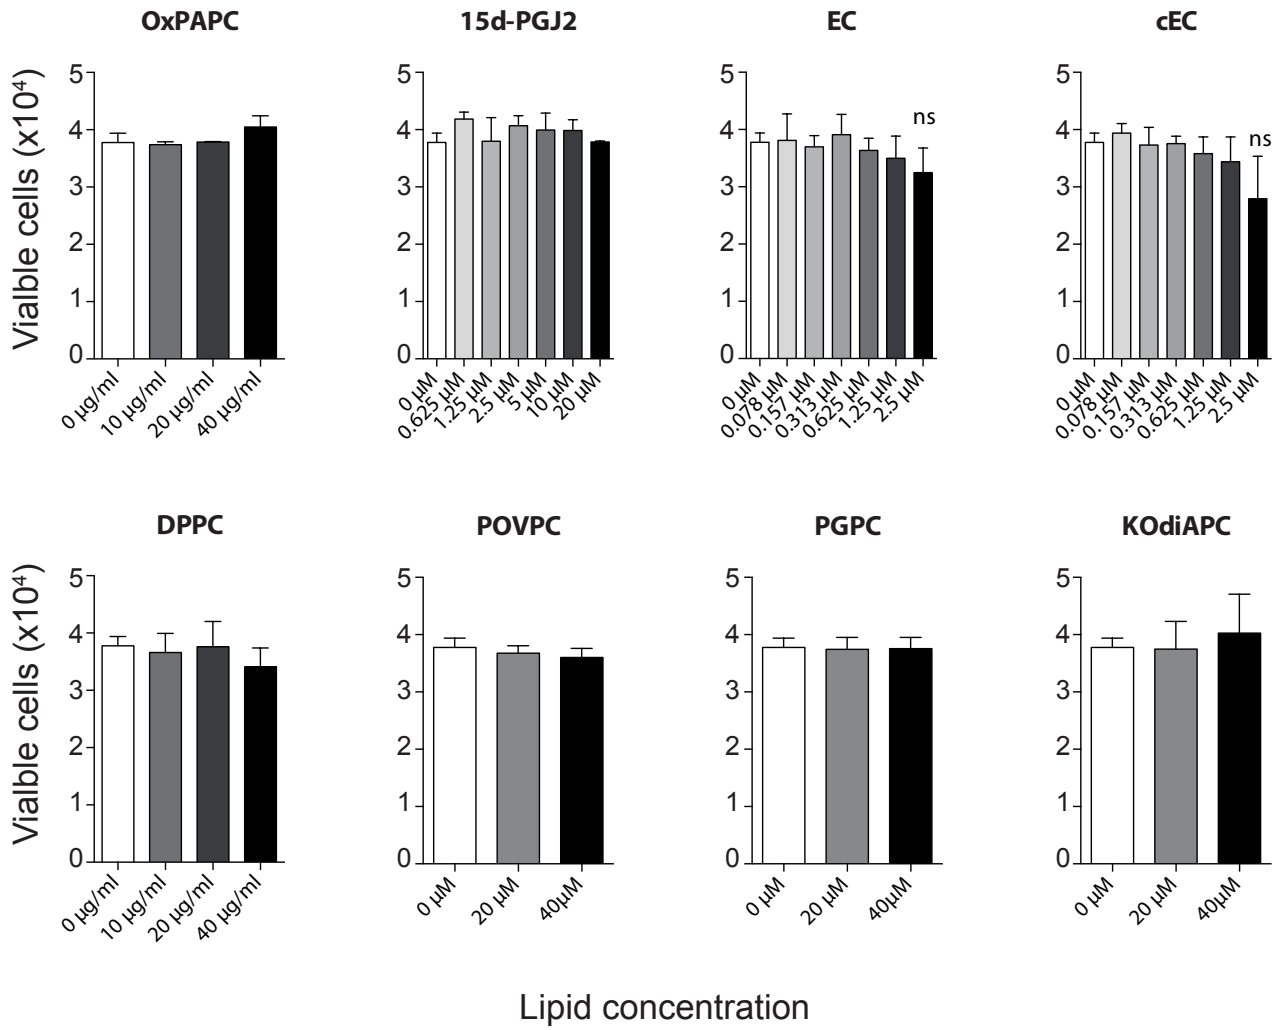

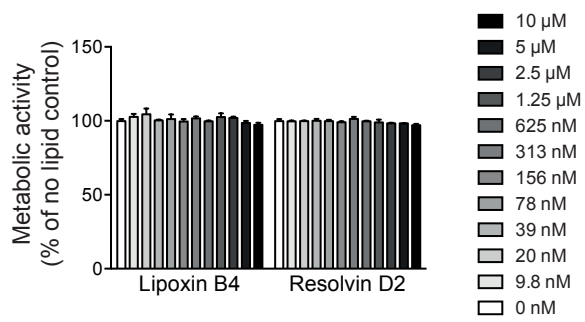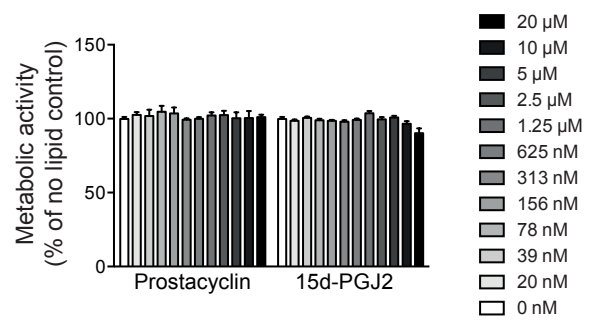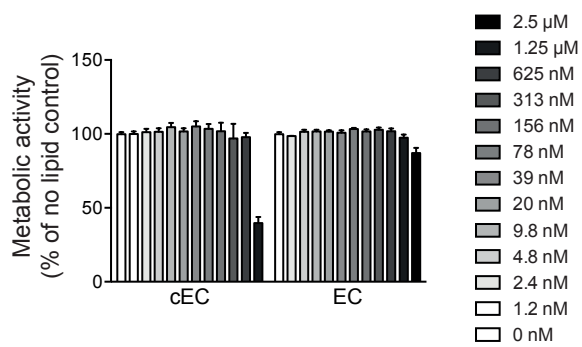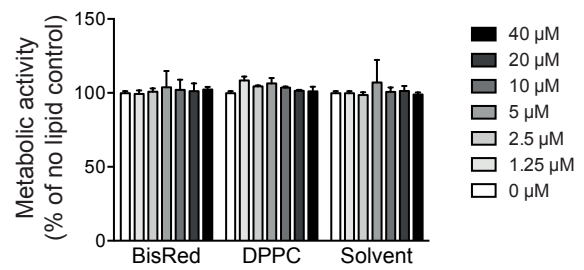

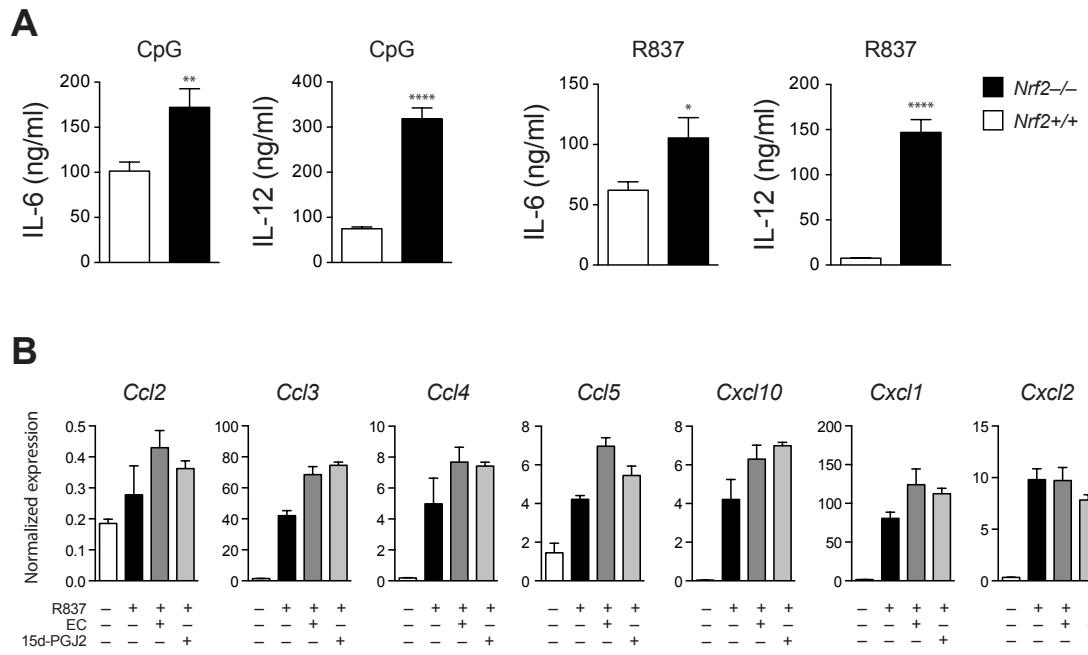

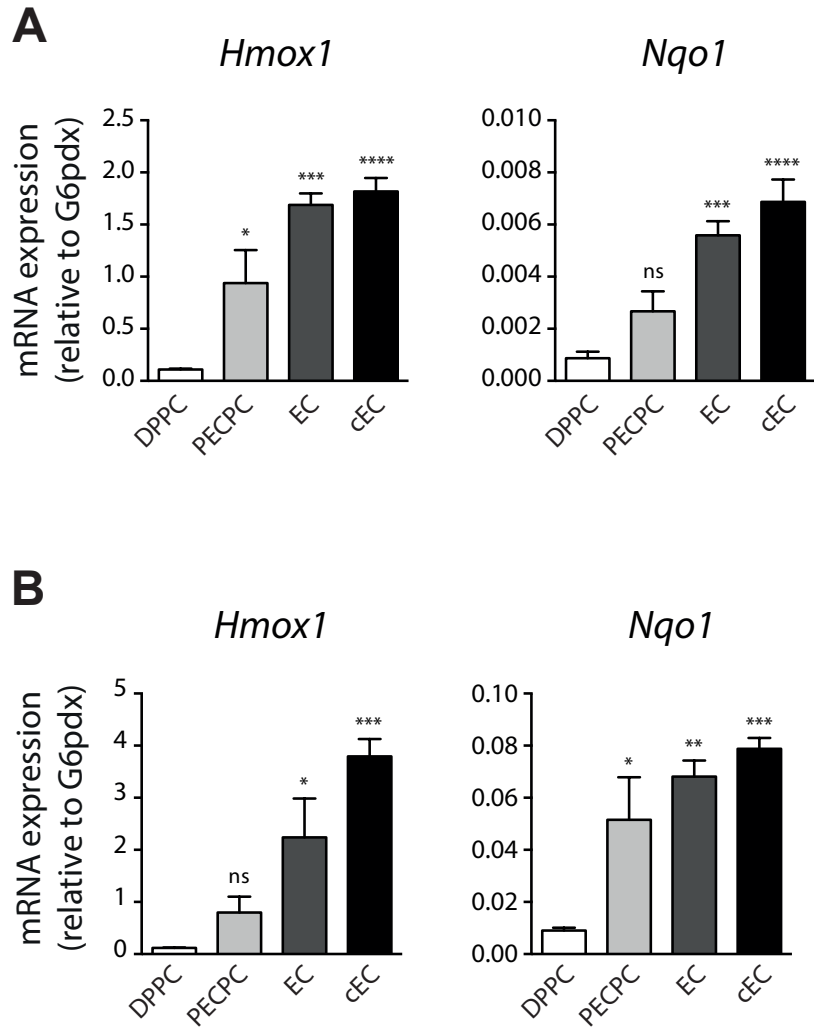

**A**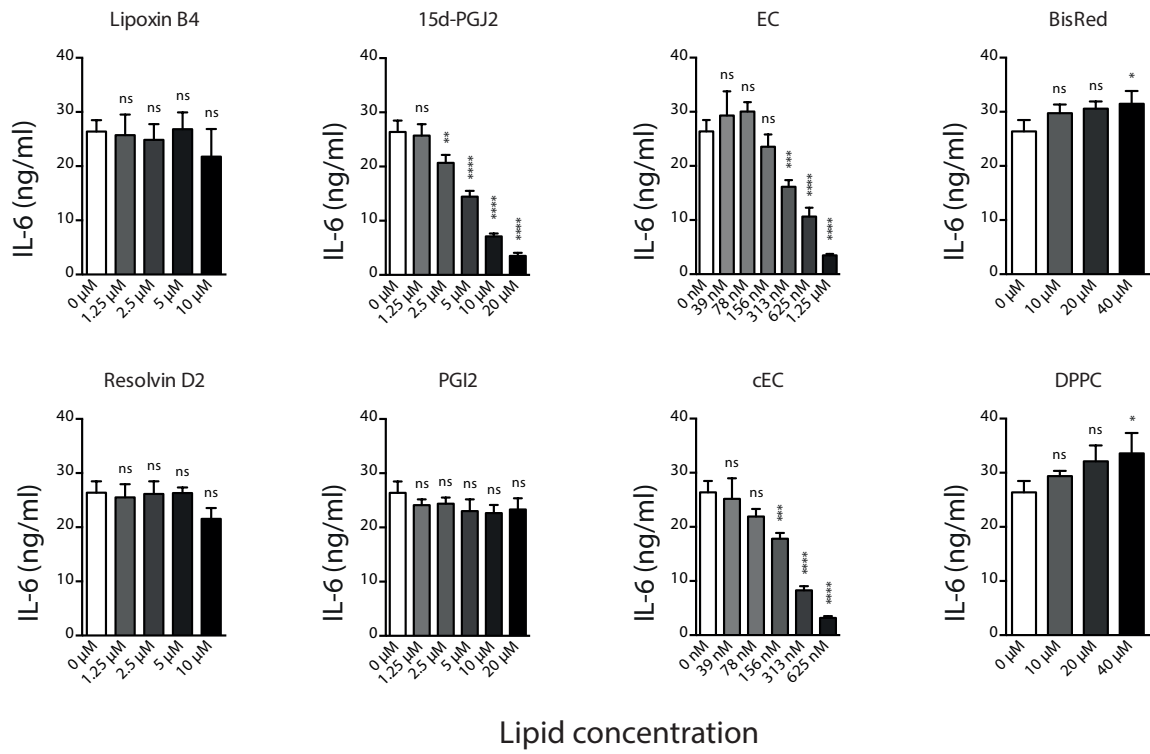**B**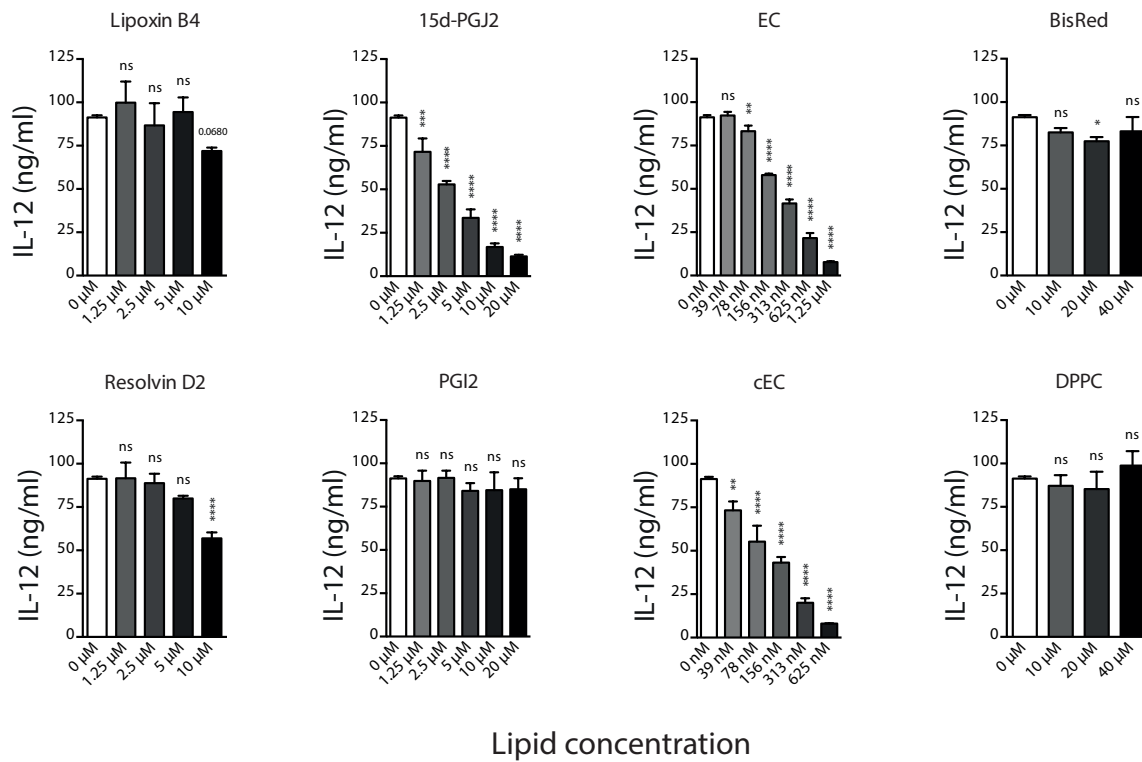

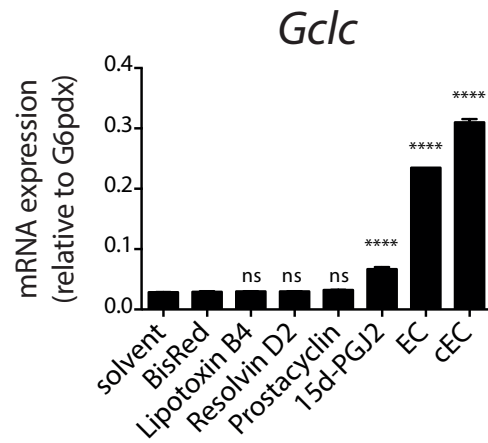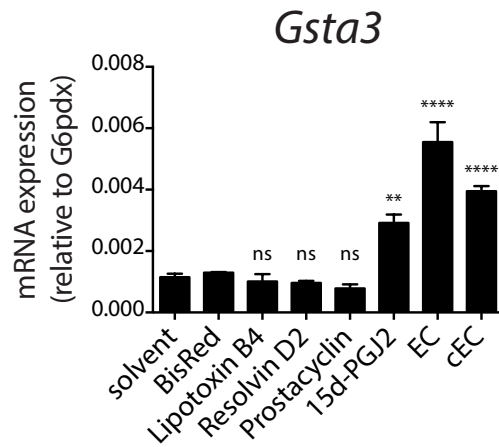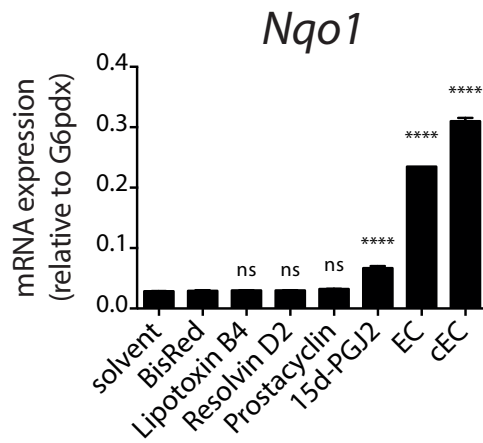



**A**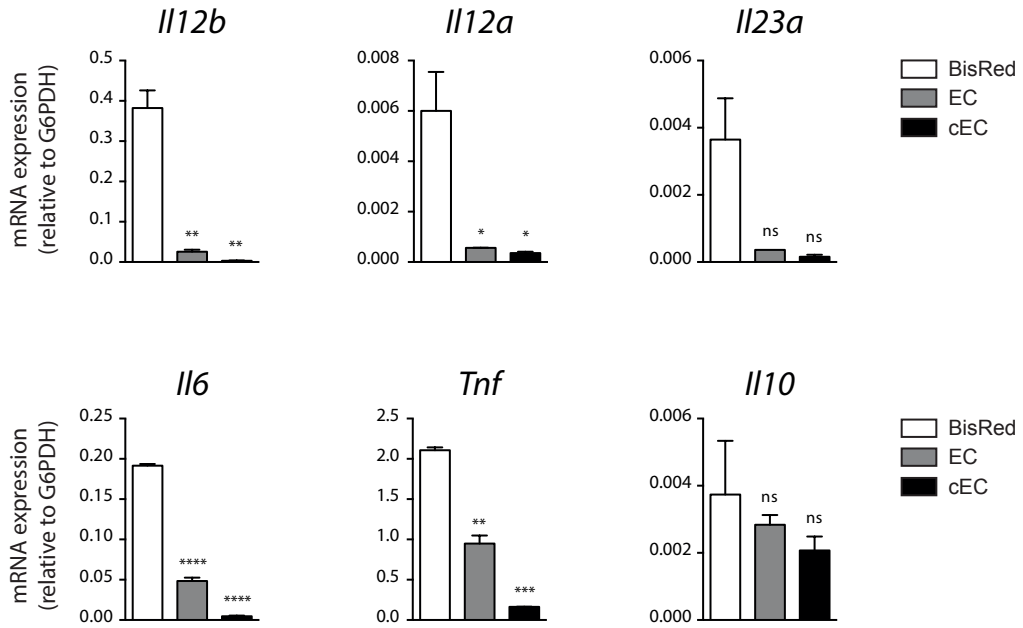**B**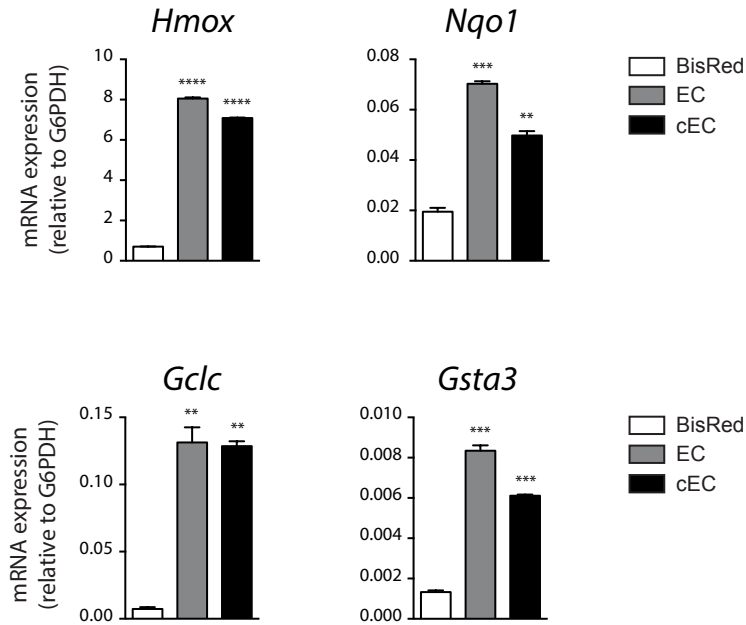

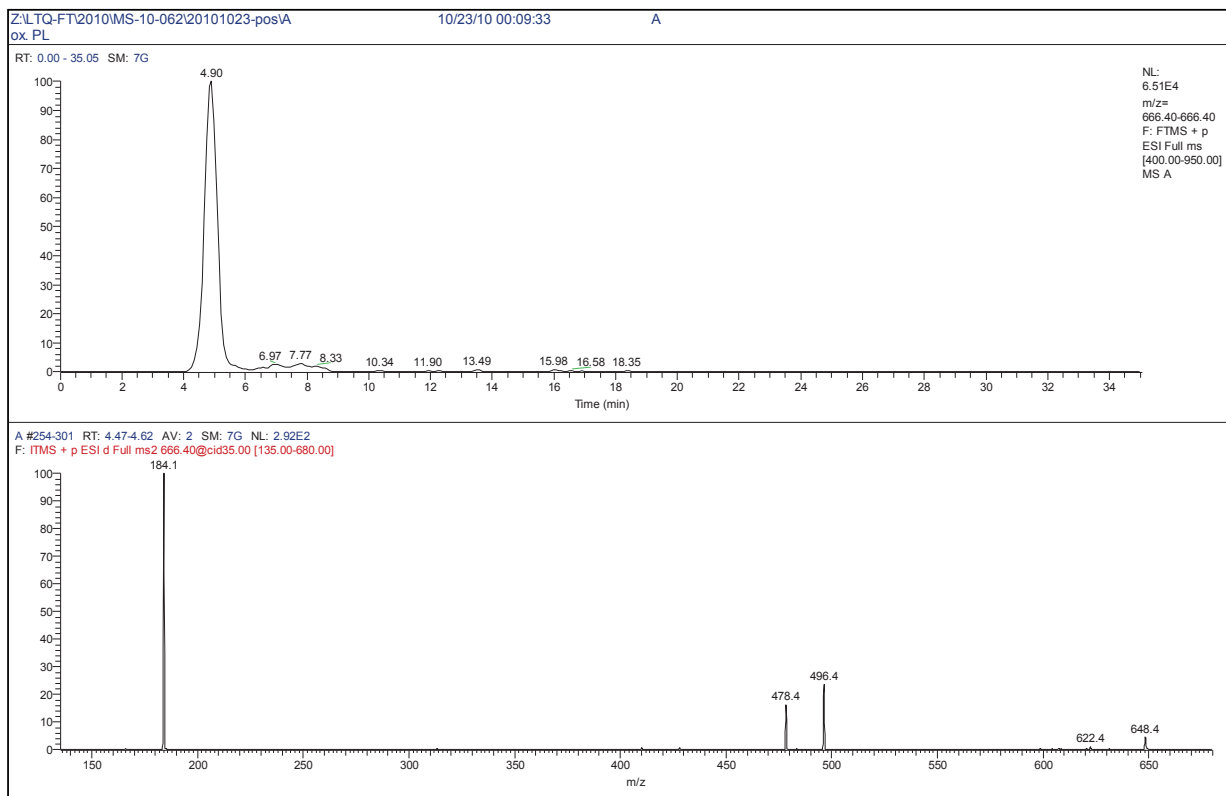

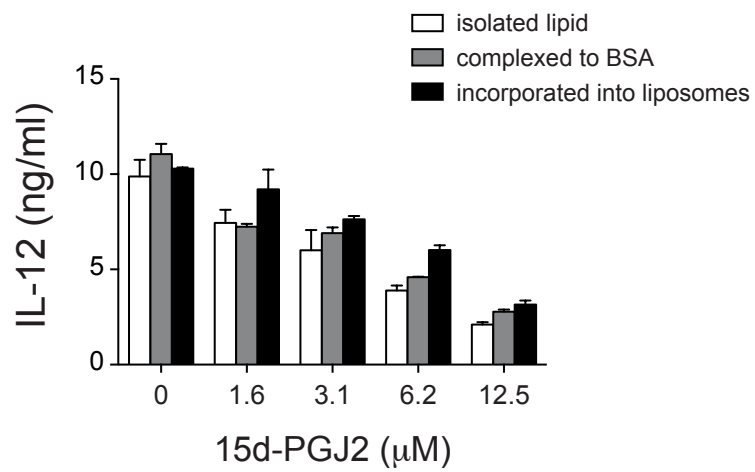

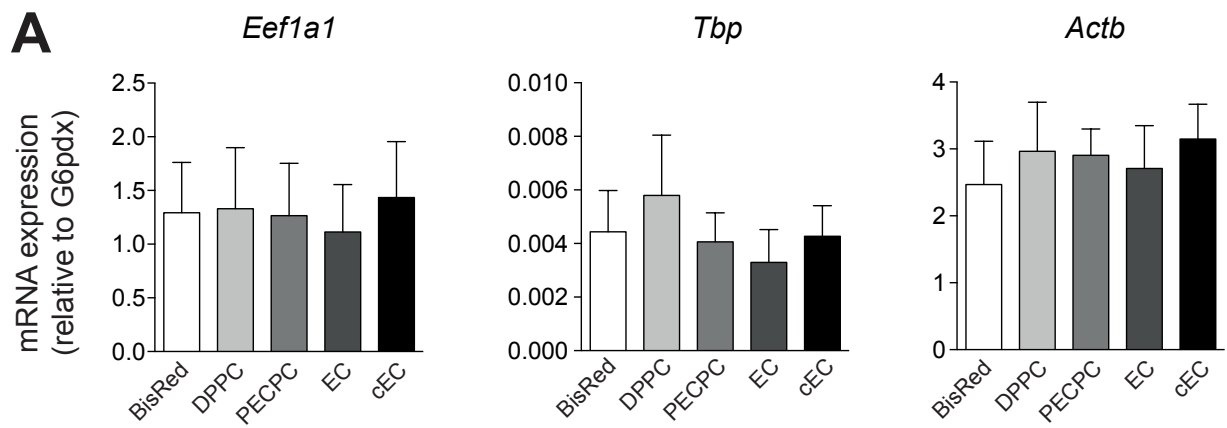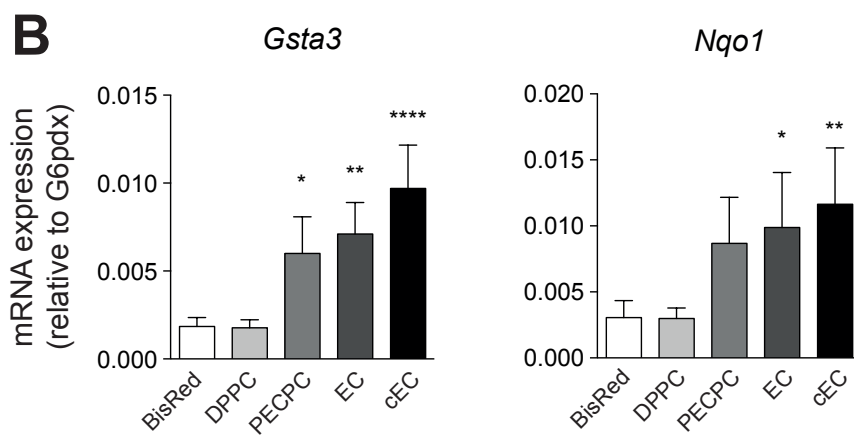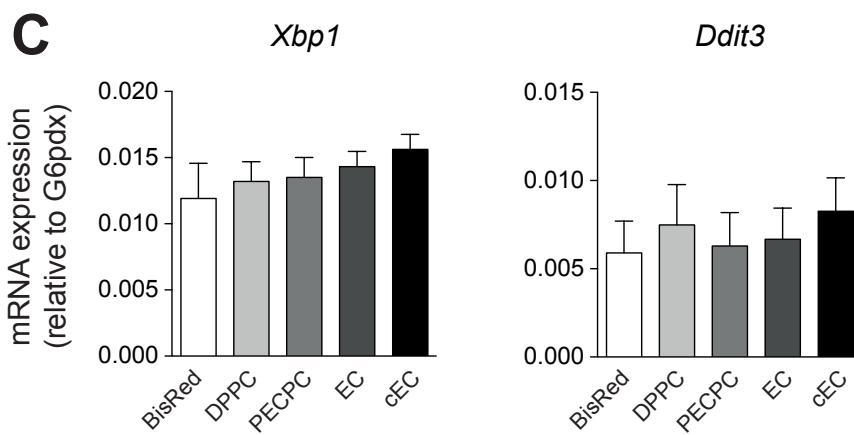

## Supplementary Figure Legends

**Supplementary Figure S1. Anti-inflammatory bioactivity of OxPL and epoxycyclopentenone lipids is not caused by toxicity.** Wild type BMDM were treated with indicated concentrations of lipids for 60 min prior to TLR7 stimulation with 5  $\mu\text{g/ml}$  R837 for 18h. Cells were then harvested and stained with the viability dye eFluor780; and absolute numbers of viable, eFluor780-negative cells were determined by FACS. Data (mean  $\pm$  SD) were analyzed by one-way ANOVA with Dunnett's multiple comparisons test.

**Supplementary Figure S2. Anti-inflammatory bioactivity of OxPL and epoxycyclopentenone lipids is not caused by toxicity.**

Wild type BMDC were treated with indicated concentrations of lipids for 60 min prior to TLR7 stimulation with 5  $\mu\text{g/ml}$  R837 for 18h. Metabolic activity was determined using the alamar blue assay. Bars represent average  $\pm$  SEM of triplicate cultures. One-way ANOVA adjusted by Dunnett's multiple comparisons test was performed to analyze statistical significance.

**Supplementary Figure S3. Enhanced inflammatory cytokine and chemokine responses of Nrf2-deficient as compared to wild type BMDC.**

(A) BMDCs of wild type and Nrf2-deficient mice were stimulated with R837 (5  $\mu\text{g/ml}$ ). Supernatants were harvested after 18h, and IL-12 levels were quantified by ELISA. (B) mRNA expression of indicated chemokines in Nrf2-deficient BMDC after treatment with EC (1  $\mu\text{M}$ ) or 15d-PGJ2 (20  $\mu\text{M}$ ) for 60 min followed by R837 (5  $\mu\text{g/ml}$ ) stimulation for 3h. Experiment was performed in parallel to Fig 4E. Expression levels are normalized to G6pdx.

**Supplementary Figure S4. Epoxycyclopentenone-containing OxPL induce Nrf2-mediated gene expression in vivo.**

(A, B) C57BL/6 mice were treated (i.t) with 50  $\mu\text{g}$  PECPC, EC, cEC or control lipid DPPC. Three hours later, the expression of Nrf2 target genes Hmox1 and Nqo1 in BAL (A) and perfused lung (B) was quantified by real-time PCR. Expression levels are normalized to G6pdx. Bars represent mean  $\pm$  SEM of groups of four animals. \*, *P*

< 0.05; \*\*,  $P < 0.01$ ; \*\*\*,  $P < 0.001$ ; \*\*\*\*,  $P < 0.0001$ ; ns, not significant; as determined by one-way ANOVA adjusted by Dunnett's multiple comparisons test.

**Supplementary Figure S5. The anti-inflammatory effect of OxPAPC is restricted to cyclopentenone-containing lipid mediators.**

(A, B) Wild type BMDC were treated with titrated amounts of the indicated lipid mediators for 60 min prior to TLR7 stimulation with 5  $\mu\text{g/ml}$  R837 for 18h. The concentrations of IL-6 (A) and IL-12 (B) in cell culture supernatants were determined by ELISA. Bars represent mean  $\pm$  SD of triplicate cultures. \*,  $P < 0.05$ ; \*\*,  $P < 0.01$ ; \*\*\*,  $P < 0.001$ ; \*\*\*\*,  $P < 0.0001$ ; ns, not significant; as determined by one-way ANOVA adjusted by Dunnett's multiple comparisons test.

**Supplementary Figure S6. The induction of Nrf2-signaling is restricted to cyclopentenone-containing lipid mediators.**

Wild type BMDC were treated with the indicated lipid mediators for 60 min prior to TLR7 stimulation with 5  $\mu\text{g/ml}$  R837 for 2.5h. The mRNA expression of the Nrf2 targets Gclc, Gsta3 and Nqo1 was quantified by quantitative real-time PCR. Gene expression levels were normalized to G6pdx and are shown as mean  $\pm$  SD. \*\*,  $P < 0.01$ ; \*\*\*\*,  $P < 0.0001$ ; ns, not significant; as determined by one-way ANOVA adjusted by Sidak's multiple comparisons test.

**Supplementary Figure S7. Epoxycyclopentenone lipids negatively regulate the expression of multiple cytokines.**

(A, B) Wild type BMDC were treated with EC, cEC or BisRed (all 1  $\mu\text{M}$ ) for 60 min prior TLR7 ligation with R837 (5  $\mu\text{g/ml}$ ) for 2h. The mRNA expression of (A) the cytokines IL-12, IL-23, IL-6,  $\text{TNF}\alpha$  and IL-10 and of (B) the Nrf2 target genes Hmox1, Nqo1, Gclc and Gsta3 and Nqo1 was quantified by quantitative real-time PCR. Gene expression levels were normalized to G6pdx and are shown as mean  $\pm$  SEM. \*\*  $P < 0.01$ ; \*\*\*  $P < 0.001$ ; \*\*\*\*  $P < 0.0001$ ; ns, not significant; by one-way ANOVA adjusted by Dunnett's multiple comparisons test.

**Supplementary Figure S8 and supplementary method. High resolution mass chromatogram of  $m/z$  666.397  $\pm$  0.005 (upper panel) and low energy LTQ CID spectrum of P-HODiA-PC at  $m/z$  666.4 and a retention time of 4.90 min (lower panel).**

Identification of oxidized PAPC products was performed by high resolution LC-MS/MS in positive electrospray ionization according to the following selectivity criteria. High resolution FT-ICR mass spectra confirmed the elemental composition of molecular ions from which truncations and additional oxygen atoms in PAPC could be confirmed. The second criterion was retention time which was for oxidized species on a C-18 reversed phase column lower than for non-oxidized species. Oxidized PAPC species eluted in the retention time range between 3 and 10 min whereas non-oxidized phospholipids elute between 10 and 20 min with the chosen HPLC settings. The third selectivity criterion were linear ion trap collision induced dissociation (CID) spectra of the oxidized molecular ions previously determined in high resolution FT-ICR-MS. All spectra of oxidized species showed fragment ions at  $m/z$  184,  $m/z$  478 and  $m/z$  496 corresponding to the choline phosphate headgroup, dehydrated 16:0 LPC and 16:0 LPC. These three diagnostic fragments together with the elemental composition indicated the rest of the phospholipid to be an oxidized and / or truncated arachidonic acid. Since it is not possible to do a full structural elucidation including stereochemistry by low energy CID spectra (35% of maximum energy), we factored in all literature known characterized oxidized PAPC species, which is a comprehensive list of 30 compounds. With these pieces of information we matched the oxidized PAPC list with the elemental compositions of our mass chromatographic peaks. This process left mostly one in some cases a maximum of up to three possible underlying structures for each molecular elemental composition determined by FT-ICR-MS. Next we manually inspected each fragment spectrum for possible characteristic fragments of the oxidized fatty acid as paradigmatically exemplified for P-HODiA-PC (Fig. S1). The protonated molecular weight of 666.39762 corresponds to the elemental composition  $C_{32}H_{60}O_{11}N_1P_1$  which leaves  $C_8H_{12}O_5$  for the oxidized fatty acid moiety after deduction of 16:0 LPC. According to literature this corresponds to HODiA. Additionally the fragment  $m/z$  648 indicates a neutral loss of  $H_2O$  derived from the hydroxy group and  $m/z$  622 corresponds to a neutral loss of M.W. 44 indicative for decarboxylation, presumably at the terminal carboxylic group of HODiA. These fragments confirmed the presence of HODiA although it does not confirm the position of the double bond or the hydroxy group. This procedure of identification was performed for all other oxidized species. For presumably oxidized PAPC species with no literature match we only indicated the elemental composition.

**Supplementary Figure S9. Effect of solubilization on the bioactivity of the cyclopentenone lipid 15d-PGJ2.**

Wild type BMDC were treated with equimolar concentrations of 15d-PGJ2 either as the free lipid, as lipid complexed to fatty acid-free BSA, or in form of lipid incorporated into 100 nm liposomes, for 60 min before activation of TLR7 with R837 (5  $\mu$ g/ml, 18h). IL-12 production in culture supernatant was determined by ELISA. Bars represent mean  $\pm$  SD with of duplicate experiments.

**Supplementary Figure S10. Expression of housekeeping genes and absence of ER stress in cyclopentenone-stimulated cells.**

(A,B,C) Wild type BMDM were treated with cEC (1  $\mu$ M), EC (1  $\mu$ M), PECPC (5  $\mu$ M), BisRed (5  $\mu$ M) and DPPC (5  $\mu$ M) for 60 min prior TLR7 ligation with R837 (5  $\mu$ g/ml) for 2h. Expression of (A) the housekeeping genes eukaryotic elongation factor 1A1 (Eef1a1), TATA-binding protein (Tbp) and  $\beta$ -actin (Actb); of (B) the Nrf2 targets Gsta3 and Nqo1; and (C) of the ER stress regulated genes X-box binding protein 1 (Xbp1) and C/EBP homologous protein (Chop) was determined by qPCR relative to G6pdx. Data represent mean  $\pm$  SEM for at least triplicate cultures. \*,  $P < 0.05$ ; \*\*,  $P < 0.01$ ; \*\*\*,  $P < 0.0001$ ; by one-way ANOVA adjusted by Dunett's multiple comparisons test.



| <b>gene</b>   | <b>Primer fwd</b>                     | <b>Primer rev</b>                    |
|---------------|---------------------------------------|--------------------------------------|
| <i>Actb</i>   | 5'-CCC TGA AGT ACC CCA TTG AAC-3'     | 5'-CTT TTC ACG GTT GGC CTT AG-3'     |
| <i>Ccl2</i>   | 5'-AGG TCC CTG TCA TGC TTC TG-3'      | 5'-ATT GGG ATC ATC TTG CTG GT-3'     |
| <i>Ccl3</i>   | 5'-AGA TTC CAC GCC AAT TCA TC-3'      | 5'-CCC AGG TCT CTT TGG AGT CA-3'     |
| <i>Ccl4</i>   | 5'-TTC TGT GCT CCA GGG TTC TC-3'      | 5'-AGC AAA GAC TGC TGG TCT CA-3'     |
| <i>Ccl5</i>   | 5'-CGC ACC TGC CTC ACC ATA-3'         | 5'-CTG CAA GAT TGG AGC ACT TG-3'     |
| <i>Cxcl1</i>  | 5'-GCC TAT CGC CAA TGA GCT G-3'       | 5'-ATT CTT GAG TGT GGC TAT GA-3'     |
| <i>Cxcl10</i> | 5'-AAG TGC TGC CGT CAT TTT CT-3'      | 5'-CCT ATG GCC CTC ATT CTC AC-3'     |
| <i>Cxcl2</i>  | 5'-AGT GAA CTG CGC TGT CAA TG-3'      | 5'-GCC CTT GAG AGT GGC TAT GAC-3'    |
| <i>Ddit3</i>  | 5'-AGC GAC AGA GCC AGA ATA AC-3'      | 5'-CCA GGT TCT GCT TTC AGG-3'        |
| <i>Eef1a1</i> | 5'-TCCA CTG GTC GCT TTT GCT-3'        | 5'-CTT CTT GTC CAC AGC TTT GAT GA-3' |
| <i>G6pdx</i>  | 5'-ATG GTG AAG GTC GGT GTG AA-3'      | 5'-TAG ACC ATG TAG TTG AGG TC-3'     |
| <i>Gclc</i>   | 5'-AAC AAG AAA CAT CCG GCA TC-3'      | 5'-CGT AGC CTC GGT AAA ATG GA-3'     |
| <i>Gsta3</i>  | 5'-GCA CTT GCT GGA ACA TCA GA-3'      | 5'-TAC TTT GAT GGC AGG GGA AG-3'     |
| <i>Hmox-1</i> | 5'-TGC TCG AAT GAA CAC TCT GG-3'      | 5'-TCC TCT GTC ACG ATC ACC TG-3'     |
| <i>IL10</i>   | 5'-GCA GGA CTT TAA GGG TTA CTT G-3'   | 5'-GAG GGT CTT CAG CTT CTC AC-3'     |
| <i>Il12a</i>  | 5'-ATG TGT CAA TCA CGC TAC CTC-3'     | 5'-ACC ATG TCA TCT GTG GTC TTC-3'    |
| <i>Il12b</i>  | 5'-TCA TCA GGG ACA TCA TCA AAC-3'     | 5'-TTG AGG GAG AAG TAG GAA TGG-3'    |
| <i>Il23</i>   | 5'-CAC CTC CCT ACT AGG ACT CAG C-3'   | 5'-CTG CCA CTG CTG ACT AGA AC-3'     |
| <i>Il6</i>    | 5'-TTC CAT CCA GT TGCC TTC TTG -3'    | 5'-TCA TTT CCA CGA TTT CCC AGA G-3'  |
| <i>Nqo1</i>   | 5'-TTA CAG CAT TGG CCA CAC TC-3'      | 5'-GGC TGC TTG GAG CAA AAT AG-3'     |
| <i>Tbp</i>    | 5'-TTG ACC TAA AGA CCA TTG CAC TTC-3' | 5'-TTC TCA TGA TGA CTG CAG CAA A-3'  |
| <i>Tnf</i>    | 5'-CCA AAG GGA TGA GAA GTT CC-3'      | 5'-GGG CCA TAG AAC TGA TGA GAG-3'    |
| <i>Xbp1</i>   | 5'-GAT CCT GAC GAG GTT CCA GA-3'      | 5'-ACA GGG TCC AAC TTG TCC AG-3'     |

| Figure | Panel  | Genotype | Active Lipid | Read-out             | Stimulus     | Comparison                | SD / SEM | n (replicates)       | n (experiments) | Statistical Test            | Exact p value | Stars |
|--------|--------|----------|--------------|----------------------|--------------|---------------------------|----------|----------------------|-----------------|-----------------------------|---------------|-------|
| 1      | a      | wt       | OxPAPC       | IL-6                 | R837         | OxPAPC vs DMSO            | SD       | 3                    | n > 3           | 1-way ANOVA, Dunnett        | < 0.0001      | ****  |
|        |        | wt       | OxPAPC       | IL-6                 | R837         | OxPAPC vs DPPC            | SD       | 3                    |                 | 1-way ANOVA, Dunnett        | < 0.0001      | ****  |
|        |        | wt       | OxPAPC       | IL-12                | R837         | OxPAPC vs DMSO            | SD       | 3                    |                 | 1-way ANOVA, Dunnett        | < 0.0001      | ****  |
|        |        | wt       | OxPAPC       | IL-12                | R837         | OxPAPC vs DPPC            | SD       | 3                    |                 | 1-way ANOVA, Dunnett        | < 0.0001      | ****  |
| 1      | b      | wt       | OxPAPC       | IL-6                 | R837         | OxPAPC vs DPPC            | SD       | 2                    | n = 3           | unpaired, two-tailed t-test | 0.0095        | **    |
|        |        | wt       | OxPAPC       | IL-12                | R837         | OxPAPC vs DPPC            | SD       | 2                    |                 | unpaired, two-tailed t-test | 0.0015        | **    |
| 1      | c      | wt       | OxPAPC       | IL-6                 | R837         | Nil vs. CuSO <sub>4</sub> | SEM      | 3                    | n = 2           | 1-way ANOVA, Dunnett        | < 0.0001      | ****  |
|        |        | wt       | OxPAPC       | IL-6                 | R837         | Nil vs. FeSO <sub>4</sub> | SEM      | 3                    |                 | 1-way ANOVA, Dunnett        | < 0.0001      | ****  |
|        |        | wt       | OxPAPC       | IL-6                 | R837         | Nil vs. O <sub>2</sub>    | SEM      | 3                    |                 | 1-way ANOVA, Dunnett        | < 0.0001      | ****  |
|        |        | wt       | OxPAPC       | IL-12                | R837         | Nil vs. CuSO <sub>4</sub> | SEM      | 3                    |                 | 1-way ANOVA, Dunnett        | < 0.0001      | ****  |
|        |        | wt       | OxPAPC       | IL-12                | R837         | Nil vs. FeSO <sub>4</sub> | SEM      | 3                    |                 | 1-way ANOVA, Dunnett        | < 0.0001      | ****  |
|        |        | wt       | OxPAPC       | IL-12                | R837         | Nil vs. O <sub>2</sub>    | SEM      | 3                    |                 | 1-way ANOVA, Dunnett        | < 0.0001      | ****  |
| 1      | e      | wt       | OxPAPC       | IL-6                 | LTA          | 0 ug/ml vs. 40 ug/ml      | SD       | 3                    | n = 3           | 1-way ANOVA, Dunnett        | < 0.0001      | ****  |
|        |        | wt       | OxPAPC       | IL-6                 | LTA          | 0 ug/ml vs. 20 ug/ml      | SD       | 3                    |                 | 1-way ANOVA, Dunnett        | < 0.0001      | ****  |
|        |        | wt       | OxPAPC       | IL-6                 | Poly I:C     | 0 ug/ml vs. 40 ug/ml      | SD       | 3                    |                 | 1-way ANOVA, Dunnett        | 0.0011        | **    |
|        |        | wt       | OxPAPC       | IL-6                 | Poly I:C     | 0 ug/ml vs. 20 ug/ml      | SD       | 3                    |                 | 1-way ANOVA, Dunnett        | 0.0404        | *     |
|        |        | wt       | OxPAPC       | IL-6                 | LPS          | 0 ug/ml vs. 40 ug/ml      | SD       | 3                    |                 | 1-way ANOVA, Dunnett        | 0.0004        | ***   |
|        |        | wt       | OxPAPC       | IL-6                 | LPS          | 0 ug/ml vs. 20 ug/ml      | SD       | 3                    |                 | 1-way ANOVA, Dunnett        | 0.0658        | ns    |
|        |        | wt       | OxPAPC       | IL-6                 | R837         | 0 ug/ml vs. 40 ug/ml      | SD       | 3                    |                 | 1-way ANOVA, Dunnett        | 0.0013        | **    |
|        |        | wt       | OxPAPC       | IL-6                 | R837         | 0 ug/ml vs. 20 ug/ml      | SD       | 3                    |                 | 1-way ANOVA, Dunnett        | 0.0298        | *     |
|        |        | wt       | OxPAPC       | IL-6                 | CpG          | 0 ug/ml vs. 40 ug/ml      | SD       | 3                    |                 | 1-way ANOVA, Dunnett        | < 0.0001      | ****  |
|        |        | wt       | OxPAPC       | IL-6                 | CpG          | 0 ug/ml vs. 20 ug/ml      | SD       | 3                    |                 | 1-way ANOVA, Dunnett        | < 0.0001      | ****  |
|        |        | wt       | OxPAPC       | IL-12                | LTA          | 0 ug/ml vs. 40 ug/ml      | SD       | 3                    | n = 3           | 1-way ANOVA, Dunnett        | < 0.0001      | ****  |
|        |        | wt       | OxPAPC       | IL-12                | LTA          | 0 ug/ml vs. 20 ug/ml      | SD       | 3                    |                 | 1-way ANOVA, Dunnett        | < 0.0001      | ****  |
|        |        | wt       | OxPAPC       | IL-12                | Poly I:C     | 0 ug/ml vs. 40 ug/ml      | SD       | 3                    |                 | 1-way ANOVA, Dunnett        | 0.0006        | ***   |
|        |        | wt       | OxPAPC       | IL-12                | Poly I:C     | 0 ug/ml vs. 20 ug/ml      | SD       | 3                    |                 | 1-way ANOVA, Dunnett        | 0.0109        | *     |
| wt     | OxPAPC | IL-12    | LPS          | 0 ug/ml vs. 40 ug/ml | SD           | 3                         |          | 1-way ANOVA, Dunnett | < 0.0001        | ****                        |               |       |
| wt     | OxPAPC | IL-12    | LPS          | 0 ug/ml vs. 20 ug/ml | SD           | 3                         |          | 1-way ANOVA, Dunnett | < 0.0001        | ****                        |               |       |
| wt     | OxPAPC | IL-12    | R837         | 0 ug/ml vs. 40 ug/ml | SD           | 3                         |          | 1-way ANOVA, Dunnett | < 0.0001        | ****                        |               |       |
| wt     | OxPAPC | IL-12    | R837         | 0 ug/ml vs. 20 ug/ml | SD           | 3                         |          | 1-way ANOVA, Dunnett | 0.0002          | ***                         |               |       |
| wt     | OxPAPC | IL-12    | CpG          | 0 ug/ml vs. 40 ug/ml | SD           | 3                         |          | 1-way ANOVA, Dunnett | < 0.0001        | ****                        |               |       |
| wt     | OxPAPC | IL-12    | CpG          | 0 ug/ml vs. 20 ug/ml | SD           | 3                         |          | 1-way ANOVA, Dunnett | 0.0002          | ***                         |               |       |
| 1      | h      | wt       | OxPAPC       | IL-4                 | gp61 peptide | OxPAPC vs DPPC            | SD       | 2                    | n > 3           | unpaired, two-tailed t-test | 0.0202        | *     |
|        |        | wt       | OxPAPC       | IFNg                 | gp61 peptide | OxPAPC vs DPPC            | SD       | 2                    |                 | unpaired, two-tailed t-test | 0.0151        | *     |
| 1      | i      | wt       | OxPAPC       | IFNg                 | gp61 peptide | 0 ug/ml vs. 64 ug/ml      | SD       | 2                    | n = 2           | 1-way ANOVA, Dunnett        | < 0.0001      | ****  |
|        |        | wt       | OxPAPC       | IFNg                 | gp61 peptide | 0 ug/ml vs. 32 ug/ml      | SD       | 2                    |                 | 1-way ANOVA, Dunnett        | < 0.0001      | ****  |
|        |        | wt       | OxPAPC       | IFNg                 | gp61 peptide | 0 ug/ml vs. 16 ug/ml      | SD       | 2                    |                 | 1-way ANOVA, Dunnett        | < 0.0001      | ****  |
|        |        | wt       | OxPAPC       | IFNg                 | gp61 peptide | 0 ug/ml vs. 8 ug/ml       | SD       | 2                    |                 | 1-way ANOVA, Dunnett        | 0.0052        | **    |
|        |        | wt       | DPPC         | IFNg                 | gp61 peptide | 0 ug/ml vs. 64 ug/ml      | SD       | 2                    |                 | 1-way ANOVA, Dunnett        | 0.9999        | ns    |
|        |        | wt       | DPPC         | IFNg                 | gp61 peptide | 0 ug/ml vs. 32 ug/ml      | SD       | 2                    |                 | 1-way ANOVA, Dunnett        | 0.9979        | ns    |
|        |        | wt       | DPPC         | IFNg                 | gp61 peptide | 0 ug/ml vs. 16 ug/ml      | SD       | 2                    |                 | 1-way ANOVA, Dunnett        | 0.927         | ns    |
|        |        | wt       | DPPC         | IFNg                 | gp61 peptide | 0 ug/ml vs. 8 ug/ml       | SD       | 2                    |                 | 1-way ANOVA, Dunnett        | 0.9947        | ns    |
|        |        | wt       | OxPAPC       | IL-6                 | R837         | DMSO vs OxPAPC            | SD       | 3                    | n = 3           | 1-way ANOVA, Sidak          | < 0.0001      | ****  |
|        |        | wt       | PEIPC        | IL-6                 | R837         | DMSO vs. PEIPC            | SD       | 3                    |                 | 1-way ANOVA, Sidak          | < 0.0001      | ****  |
| wt     | PECPC  | IL-6     | R837         | DMSO vs. PECPC       | SD           | 3                         |          | 1-way ANOVA, Sidak   | < 0.0001        | ****                        |               |       |

|   |   |           |            |       |      |                       |     |   |       |                      |          |      |
|---|---|-----------|------------|-------|------|-----------------------|-----|---|-------|----------------------|----------|------|
|   |   | wt        | POVPC      | IL-6  | R837 | DMSO vs. POVPC        | SD  | 3 |       | 1-way ANOVA, Sidak   | 0.9855   | ns   |
|   |   | wt        | PGPC       | IL-6  | R837 | DMSO vs. PGPC         | SD  | 3 |       | 1-way ANOVA, Sidak   | 0.9828   | ns   |
|   |   | wt        | KOdiAPC    | IL-6  | R837 | DMSO vs. KOdiAPC      | SD  | 3 |       | 1-way ANOVA, Sidak   | < 0.0001 | **** |
|   |   | wt        | OxPAPC     | IL-6  | R837 | DPPC vs. OxPAPC       | SD  | 3 |       | 1-way ANOVA, Sidak   | < 0.0001 | **** |
|   |   | wt        | PEIPC      | IL-6  | R837 | DPPC vs. PEIPC        | SD  | 3 |       | 1-way ANOVA, Sidak   | < 0.0001 | **** |
|   |   | wt        | PECPC      | IL-6  | R837 | DPPC vs. PECPC        | SD  | 3 |       | 1-way ANOVA, Sidak   | < 0.0001 | **** |
|   |   | wt        | POVPC      | IL-6  | R837 | DPPC vs. POVPC        | SD  | 3 |       | 1-way ANOVA, Sidak   | 0.9736   | ns   |
|   |   | wt        | PGPC       | IL-6  | R837 | DPPC vs. PGPC         | SD  | 3 |       | 1-way ANOVA, Sidak   | 0.9694   | ns   |
|   |   | wt        | KOdiAPC    | IL-6  | R837 | DPPC vs. KOdiAPC      | SD  | 3 |       | 1-way ANOVA, Sidak   | < 0.0001 | **** |
|   |   | wt        | OxPAPC     | IL-12 | R837 | DMSO vs. OxPAPC       | SD  | 3 |       | 1-way ANOVA, Sidak   | < 0.0001 | ns   |
|   |   | wt        | PEIPC      | IL-12 | R837 | DMSO vs. PEIPC        | SD  | 3 |       | 1-way ANOVA, Sidak   | < 0.0001 | **** |
|   |   | wt        | PECPC      | IL-12 | R837 | DMSO vs. PECPC        | SD  | 3 |       | 1-way ANOVA, Sidak   | < 0.0001 | **** |
|   |   | wt        | POVPC      | IL-12 | R837 | DMSO vs. POVPC        | SD  | 3 |       | 1-way ANOVA, Sidak   | 0.0643   | **** |
|   |   | wt        | PGPC       | IL-12 | R837 | DMSO vs. PGPC         | SD  | 3 |       | 1-way ANOVA, Sidak   | 0.7859   | ns   |
|   |   | wt        | KOdiAPC    | IL-12 | R837 | DMSO vs. KOdiAPC      | SD  | 3 |       | 1-way ANOVA, Sidak   | > 0.9999 | ns   |
|   |   | wt        | OxPAPC     | IL-12 | R837 | DPPC vs. OxPAPC       | SD  | 3 |       | 1-way ANOVA, Sidak   | < 0.0001 | ns   |
|   |   | wt        | PEIPC      | IL-12 | R837 | DPPC vs. PEIPC        | SD  | 3 |       | 1-way ANOVA, Sidak   | < 0.0001 | **** |
|   |   | wt        | PECPC      | IL-12 | R837 | DPPC vs. PECPC        | SD  | 3 |       | 1-way ANOVA, Sidak   | < 0.0001 | **** |
|   |   | wt        | POVPC      | IL-12 | R837 | DPPC vs. POVPC        | SD  | 3 |       | 1-way ANOVA, Sidak   | 0.9002   | **** |
|   |   | wt        | PGPC       | IL-12 | R837 | DPPC vs. PGPC         | SD  | 3 |       | 1-way ANOVA, Sidak   | > 0.9999 | ns   |
|   |   | wt        | KOdiAPC    | IL-12 | R837 | DPPC vs. KOdiAPC      | SD  | 3 |       | 1-way ANOVA, Sidak   | 0.3455   | ns   |
| 3 | e | wt        | EC         | IL-12 | LPS  | Med vs. EC            | SEM | 3 | n = 3 | 1-way ANOVA, Dunnett | < 0.0001 | **** |
|   |   | wt        | PECPC      | IL-12 | LPS  | Med vs. PECPC         | SEM | 3 |       | 1-way ANOVA, Dunnett | 0.0003   | ***  |
|   |   | wt        | 15d-PGJ2   | IL-12 | LPS  | Med vs. 15d-PGJ2      | SEM | 3 |       | 1-way ANOVA, Dunnett | < 0.0001 | **** |
|   |   | wt        | 15d-PGJ2PC | IL-12 | LPS  | Med vs. 15d-PGJ2PC    | SEM | 3 |       | 1-way ANOVA, Dunnett | 0.0013   | **   |
|   |   | wt        | EC         | IL-12 | CpG  | Med vs. EC            | SEM | 3 |       | 1-way ANOVA, Dunnett | < 0.0001 | **** |
|   |   | wt        | PECPC      | IL-12 | CpG  | Med vs. PECPC         | SEM | 3 |       | 1-way ANOVA, Dunnett | < 0.0001 | **** |
|   |   | wt        | 15d-PGJ2   | IL-12 | CpG  | Med vs. 15d-PGJ2      | SEM | 3 |       | 1-way ANOVA, Dunnett | < 0.0001 | **** |
|   |   | wt        | 15d-PGJ2PC | IL-12 | CpG  | Med vs. 15d-PGJ2PC    | SEM | 3 |       | 1-way ANOVA, Dunnett | < 0.0001 | **** |
|   |   | wt        | EC         | IL-12 | R837 | Med vs. EC            | SEM | 3 |       | 1-way ANOVA, Dunnett | < 0.0001 | **** |
|   |   | wt        | PECPC      | IL-12 | R837 | Med vs. PECPC         | SEM | 3 |       | 1-way ANOVA, Dunnett | < 0.0001 | **** |
|   |   | wt        | 15d-PGJ2   | IL-12 | R837 | Med vs. 15d-PGJ2      | SEM | 3 |       | 1-way ANOVA, Dunnett | < 0.0001 | **** |
|   |   | wt        | 15d-PGJ2PC | IL-12 | R837 | Med vs. 15d-PGJ2PC    | SEM | 3 |       | 1-way ANOVA, Dunnett | < 0.0001 | **** |
| 4 | a | pparg -/- | OxPAPC     | IL-12 | R837 | no lipid vs. 40 ug/ml | SEM | 3 | n = 3 | 1-way ANOVA, Dunnett | < 0.0001 | **** |
|   |   | pparg -/- | OxPAPC     | IL-12 | R837 | no lipid vs. 20 ug/ml | SEM | 3 |       | 1-way ANOVA, Dunnett | 0.0003   | ***  |
|   |   | pparg +/+ | OxPAPC     | IL-12 | R837 | no lipid vs. 40 ug/ml | SEM | 3 |       | 1-way ANOVA, Dunnett | < 0.0001 | **** |
|   |   | pparg +/+ | OxPAPC     | IL-12 | R837 | no lipid vs. 20 ug/ml | SEM | 3 |       | 1-way ANOVA, Dunnett | < 0.0001 | **** |
|   |   | nrf2 -/-  | OxPAPC     | IL-12 | R837 | no lipid vs. 40 ug/ml | SEM | 3 |       | 1-way ANOVA, Dunnett | 0.7537   | ns   |
|   |   | nrf2 -/-  | OxPAPC     | IL-12 | R837 | no lipid vs. 20 ug/ml | SEM | 3 |       | 1-way ANOVA, Dunnett | 0.0091   | **   |
|   |   | nrf2 +/+  | OxPAPC     | IL-12 | R837 | no lipid vs. 40 ug/ml | SEM | 3 |       | 1-way ANOVA, Dunnett | < 0.0001 | **** |
|   |   | nrf2 +/+  | OxPAPC     | IL-12 | R837 | no lipid vs. 20 ug/ml | SEM | 3 |       | 1-way ANOVA, Dunnett | < 0.0001 | **** |
|   |   | pparg -/- | EC         | IL-12 | R837 | no lipid vs. 1.25 uM  | SEM | 3 |       | 1-way ANOVA, Dunnett | < 0.0001 | **** |
|   |   | pparg -/- | EC         | IL-12 | R837 | no lipid vs. 0.625 uM | SEM | 3 |       | 1-way ANOVA, Dunnett | < 0.0001 | **** |
|   |   | pparg -/- | EC         | IL-12 | R837 | no lipid vs. 0.313 uM | SEM | 3 |       | 1-way ANOVA, Dunnett | < 0.0001 | **** |
|   |   | pparg +/+ | EC         | IL-12 | R837 | no lipid vs. 1.25 uM  | SEM | 3 |       | 1-way ANOVA, Dunnett | < 0.0001 | **** |
|   |   | pparg +/+ | EC         | IL-12 | R837 | no lipid vs. 0.625 uM | SEM | 3 |       | 1-way ANOVA, Dunnett | < 0.0001 | **** |
|   |   | pparg +/+ | EC         | IL-12 | R837 | no lipid vs. 0.313 uM | SEM | 3 |       | 1-way ANOVA, Dunnett | < 0.0001 | **** |
|   |   | nrf2 -/-  | EC         | IL-12 | R837 | no lipid vs. 1.25 uM  | SEM | 3 |       | 1-way ANOVA, Dunnett | 0.1619   | ns   |

|  |  |           |          |       |      |                       |     |   |  |                      |          |      |
|--|--|-----------|----------|-------|------|-----------------------|-----|---|--|----------------------|----------|------|
|  |  | nrf2 -/-  | EC       | IL-12 | R837 | no lipid vs. 0.625 uM | SEM | 3 |  | 1-way ANOVA, Dunnett | 0.9752   | ns   |
|  |  | nrf2 -/-  | EC       | IL-12 | R837 | no lipid vs. 0.313 uM | SEM | 3 |  | 1-way ANOVA, Dunnett | 0.9977   | ns   |
|  |  | nrf2 +/+  | EC       | IL-12 | R837 | no lipid vs. 1.25 uM  | SEM | 3 |  | 1-way ANOVA, Dunnett | < 0.0001 | **** |
|  |  | nrf2 +/+  | EC       | IL-12 | R837 | no lipid vs. 0.625 uM | SEM | 3 |  | 1-way ANOVA, Dunnett | < 0.0001 | **** |
|  |  | nrf2 +/+  | EC       | IL-12 | R837 | no lipid vs. 0.313 uM | SEM | 3 |  | 1-way ANOVA, Dunnett | < 0.0001 | **** |
|  |  | pparg -/- | POVPC    | IL-12 | R837 | no lipid vs. 40 uM    | SEM | 3 |  | 1-way ANOVA, Dunnett | 0.6435   | ns   |
|  |  | pparg -/- | POVPC    | IL-12 | R837 | no lipid vs. 20 uM    | SEM | 3 |  | 1-way ANOVA, Dunnett | 0.2514   | ns   |
|  |  | pparg -/- | POVPC    | IL-12 | R837 | no lipid vs. 10 uM    | SEM | 3 |  | 1-way ANOVA, Dunnett | 0.908    | ns   |
|  |  | pparg +/+ | POVPC    | IL-12 | R837 | no lipid vs. 40 uM    | SEM | 3 |  | 1-way ANOVA, Dunnett | 0.9996   | ns   |
|  |  | pparg +/+ | POVPC    | IL-12 | R837 | no lipid vs. 20 uM    | SEM | 3 |  | 1-way ANOVA, Dunnett | 0.9239   | ns   |
|  |  | pparg +/+ | POVPC    | IL-12 | R837 | no lipid vs. 10 uM    | SEM | 3 |  | 1-way ANOVA, Dunnett | 0.8813   | ns   |
|  |  | nrf2 -/-  | POVPC    | IL-12 | R837 | no lipid vs. 40 uM    | SEM | 3 |  | 1-way ANOVA, Dunnett | 0.0015   | **   |
|  |  | nrf2 -/-  | POVPC    | IL-12 | R837 | no lipid vs. 20 uM    | SEM | 3 |  | 1-way ANOVA, Dunnett | 0.003    | **   |
|  |  | nrf2 -/-  | POVPC    | IL-12 | R837 | no lipid vs. 10 uM    | SEM | 3 |  | 1-way ANOVA, Dunnett | 0.0028   | **   |
|  |  | nrf2 +/+  | POVPC    | IL-12 | R837 | no lipid vs. 40 uM    | SEM | 3 |  | 1-way ANOVA, Dunnett | 0.8039   | ns   |
|  |  | nrf2 +/+  | POVPC    | IL-12 | R837 | no lipid vs. 20 uM    | SEM | 3 |  | 1-way ANOVA, Dunnett | 0.6191   | ns   |
|  |  | nrf2 +/+  | POVPC    | IL-12 | R837 | no lipid vs. 10 uM    | SEM | 3 |  | 1-way ANOVA, Dunnett | > 0.9999 | ns   |
|  |  | pparg -/- | PGPC     | IL-12 | R837 | no lipid vs. 40 uM    | SEM | 3 |  | 1-way ANOVA, Dunnett | 0.0493   | *    |
|  |  | pparg -/- | PGPC     | IL-12 | R837 | no lipid vs. 20 uM    | SEM | 3 |  | 1-way ANOVA, Dunnett | 0.391    | ns   |
|  |  | pparg -/- | PGPC     | IL-12 | R837 | no lipid vs. 10 uM    | SEM | 3 |  | 1-way ANOVA, Dunnett | 0.9843   | ns   |
|  |  | pparg +/+ | PGPC     | IL-12 | R837 | no lipid vs. 40 uM    | SEM | 3 |  | 1-way ANOVA, Dunnett | 0.1661   | ns   |
|  |  | pparg +/+ | PGPC     | IL-12 | R837 | no lipid vs. 20 uM    | SEM | 3 |  | 1-way ANOVA, Dunnett | > 0.9999 | ns   |
|  |  | pparg +/+ | PGPC     | IL-12 | R837 | no lipid vs. 10 uM    | SEM | 3 |  | 1-way ANOVA, Dunnett | 0.9789   | ns   |
|  |  | nrf2 -/-  | PGPC     | IL-12 | R837 | no lipid vs. 40 uM    | SEM | 3 |  | 1-way ANOVA, Dunnett | 0.0148   | *    |
|  |  | nrf2 -/-  | PGPC     | IL-12 | R837 | no lipid vs. 20 uM    | SEM | 3 |  | 1-way ANOVA, Dunnett | 0.016    | *    |
|  |  | nrf2 -/-  | PGPC     | IL-12 | R837 | no lipid vs. 10 uM    | SEM | 3 |  | 1-way ANOVA, Dunnett | 0.0539   | ns   |
|  |  | nrf2 +/+  | PGPC     | IL-12 | R837 | no lipid vs. 40 uM    | SEM | 3 |  | 1-way ANOVA, Dunnett | 0.0161   | *    |
|  |  | nrf2 +/+  | PGPC     | IL-12 | R837 | no lipid vs. 20 uM    | SEM | 3 |  | 1-way ANOVA, Dunnett | 0.1546   | ns   |
|  |  | nrf2 +/+  | PGPC     | IL-12 | R837 | no lipid vs. 10 uM    | SEM | 3 |  | 1-way ANOVA, Dunnett | 0.9645   | ns   |
|  |  | pparg -/- | KOdiAPC  | IL-12 | R837 | no lipid vs. 40 uM    | SEM | 3 |  | 1-way ANOVA, Dunnett | 0.682    | ns   |
|  |  | pparg -/- | KOdiAPC  | IL-12 | R837 | no lipid vs. 20 uM    | SEM | 3 |  | 1-way ANOVA, Dunnett | 0.2602   | ns   |
|  |  | pparg -/- | KOdiAPC  | IL-12 | R837 | no lipid vs. 10 uM    | SEM | 3 |  | 1-way ANOVA, Dunnett | > 0.9999 | ns   |
|  |  | pparg +/+ | KOdiAPC  | IL-12 | R837 | no lipid vs. 40 uM    | SEM | 3 |  | 1-way ANOVA, Dunnett | 0.9253   | ns   |
|  |  | pparg +/+ | KOdiAPC  | IL-12 | R837 | no lipid vs. 20 uM    | SEM | 3 |  | 1-way ANOVA, Dunnett | 0.7503   | ns   |
|  |  | pparg +/+ | KOdiAPC  | IL-12 | R837 | no lipid vs. 10 uM    | SEM | 3 |  | 1-way ANOVA, Dunnett | 0.8048   | ns   |
|  |  | nrf2 -/-  | KOdiAPC  | IL-12 | R837 | no lipid vs. 40 uM    | SEM | 3 |  | 1-way ANOVA, Dunnett | 0.0008   | ***  |
|  |  | nrf2 -/-  | KOdiAPC  | IL-12 | R837 | no lipid vs. 20 uM    | SEM | 3 |  | 1-way ANOVA, Dunnett | 0.0021   | **   |
|  |  | nrf2 -/-  | KOdiAPC  | IL-12 | R837 | no lipid vs. 10 uM    | SEM | 3 |  | 1-way ANOVA, Dunnett | 0.001    | ***  |
|  |  | nrf2 +/+  | KOdiAPC  | IL-12 | R837 | no lipid vs. 40 uM    | SEM | 3 |  | 1-way ANOVA, Dunnett | 0.5674   | ns   |
|  |  | nrf2 +/+  | KOdiAPC  | IL-12 | R837 | no lipid vs. 20 uM    | SEM | 3 |  | 1-way ANOVA, Dunnett | 0.4192   | ns   |
|  |  | nrf2 +/+  | KOdiAPC  | IL-12 | R837 | no lipid vs. 10 uM    | SEM | 3 |  | 1-way ANOVA, Dunnett | 0.4722   | ns   |
|  |  | pparg -/- | 15d-PGJ2 | IL-12 | R837 | no lipid vs. 20 uM    | SEM | 3 |  | 1-way ANOVA, Dunnett | < 0.0001 | **** |
|  |  | pparg -/- | 15d-PGJ2 | IL-12 | R837 | no lipid vs. 10 uM    | SEM | 3 |  | 1-way ANOVA, Dunnett | < 0.0001 | **** |
|  |  | pparg -/- | 15d-PGJ2 | IL-12 | R837 | no lipid vs. 5 uM     | SEM | 3 |  | 1-way ANOVA, Dunnett | < 0.0001 | **** |
|  |  | pparg -/- | 15d-PGJ2 | IL-12 | R837 | no lipid vs. 2.5 uM   | SEM | 3 |  | 1-way ANOVA, Dunnett | 0.0005   | ***  |
|  |  | pparg +/+ | 15d-PGJ2 | IL-12 | R837 | no lipid vs. 20 uM    | SEM | 3 |  | 1-way ANOVA, Dunnett | < 0.0001 | **** |
|  |  | pparg +/+ | 15d-PGJ2 | IL-12 | R837 | no lipid vs. 10 uM    | SEM | 3 |  | 1-way ANOVA, Dunnett | < 0.0001 | **** |
|  |  | pparg +/+ | 15d-PGJ2 | IL-12 | R837 | no lipid vs. 5 uM     | SEM | 3 |  | 1-way ANOVA, Dunnett | < 0.0001 | **** |

|   |   |           |          |        |      |                                    |     |     |       |                      |          |      |
|---|---|-----------|----------|--------|------|------------------------------------|-----|-----|-------|----------------------|----------|------|
|   |   | pparg +/- | 15d-PGJ2 | IL-12  | R837 | no lipid vs. 2.5 uM                | SEM | 3   |       | 1-way ANOVA, Dunnett | < 0.0001 | **** |
|   |   | nrf2 -/-  | 15d-PGJ2 | IL-12  | R837 | no lipid vs. 20 uM                 | SEM | 3   |       | 1-way ANOVA, Dunnett | 0.3625   | ns   |
|   |   | nrf2 -/-  | 15d-PGJ2 | IL-12  | R837 | no lipid vs. 10 uM                 | SEM | 3   |       | 1-way ANOVA, Dunnett | 0.7379   | ns   |
|   |   | nrf2 -/-  | 15d-PGJ2 | IL-12  | R837 | no lipid vs. 5 uM                  | SEM | 3   |       | 1-way ANOVA, Dunnett | 0.8127   | ns   |
|   |   | nrf2 -/-  | 15d-PGJ2 | IL-12  | R837 | no lipid vs. 2.5 uM                | SEM | 3   |       | 1-way ANOVA, Dunnett | 0.2942   | ns   |
|   |   | nrf2 +/-  | 15d-PGJ2 | IL-12  | R837 | no lipid vs. 20 uM                 | SEM | 3   |       | 1-way ANOVA, Dunnett | < 0.0001 | **** |
|   |   | nrf2 +/-  | 15d-PGJ2 | IL-12  | R837 | no lipid vs. 10 uM                 | SEM | 3   |       | 1-way ANOVA, Dunnett | < 0.0001 | **** |
|   |   | nrf2 +/-  | 15d-PGJ2 | IL-12  | R837 | no lipid vs. 5 uM                  | SEM | 3   |       | 1-way ANOVA, Dunnett | < 0.0001 | **** |
|   |   | nrf2 +/-  | 15d-PGJ2 | IL-12  | R837 | no lipid vs. 2.5 uM                | SEM | 3   |       | 1-way ANOVA, Dunnett | < 0.0001 | **** |
| 4 | b | wt        | EC       | nqo1   | R837 | 0h vs. 2h                          | SD  | 2   | n = 2 | 1-way ANOVA, Dunnett | 0.0019   | **   |
|   |   | wt        | EC       | nqo1   | R837 | 0h vs. 4h                          | SD  | 2   |       | 1-way ANOVA, Dunnett | < 0.0001 | **** |
|   |   | wt        | EC       | nqo1   | R837 | 0h vs. 6h                          | SD  | 2   |       | 1-way ANOVA, Dunnett | < 0.0001 | **** |
|   |   | wt        | EC       | nqo1   | R837 | 0h vs. 8h                          | SD  | 2   |       | 1-way ANOVA, Dunnett | < 0.0001 | **** |
|   |   | nrf2 -/-  | EC       | nqo1   | R837 | 0h vs. 2h                          | SD  | 2   |       | 1-way ANOVA, Dunnett | 0.5881   | ns   |
|   |   | nrf2 -/-  | EC       | nqo1   | R837 | 0h vs. 4h                          | SD  | 2   |       | 1-way ANOVA, Dunnett | 0.9634   | ns   |
|   |   | nrf2 -/-  | EC       | nqo1   | R837 | 0h vs. 6h                          | SD  | 2   |       | 1-way ANOVA, Dunnett | 0.6533   | ns   |
|   |   | nrf2 -/-  | EC       | nqo1   | R837 | 0h vs. 8h                          | SD  | 2   |       | 1-way ANOVA, Dunnett | 0.629    | ns   |
|   |   | wt        | EC       | hmox-1 | R837 | 0h vs. 2h                          | SD  | 2   |       | 1-way ANOVA, Dunnett | 0.0202   | *    |
|   |   | wt        | EC       | hmox-1 | R837 | 0h vs. 4h                          | SD  | 2   |       | 1-way ANOVA, Dunnett | 0.0004   | ***  |
|   |   | wt        | EC       | hmox-1 | R837 | 0h vs. 6h                          | SD  | 2   |       | 1-way ANOVA, Dunnett | 0.0032   | **   |
|   |   | wt        | EC       | hmox-1 | R837 | 0h vs. 8h                          | SD  | 2   |       | 1-way ANOVA, Dunnett | 0.4701   | ns   |
|   |   | nrf2 -/-  | EC       | hmox-1 | R837 | 0h vs. 2h                          | SD  | 2   |       | 1-way ANOVA, Dunnett | 0.6491   | ns   |
|   |   | nrf2 -/-  | EC       | hmox-1 | R837 | 0h vs. 4h                          | SD  | 2   |       | 1-way ANOVA, Dunnett | 0.2282   | ns   |
|   |   | nrf2 -/-  | EC       | hmox-1 | R837 | 0h vs. 6h                          | SD  | 2   |       | 1-way ANOVA, Dunnett | 0.7083   | ns   |
|   |   | nrf2 -/-  | EC       | hmox-1 | R837 | 0h vs. 8h                          | SD  | 2   |       | 1-way ANOVA, Dunnett | > 0.9999 | ns   |
| 4 | c | wt        | EC       | gclc   | LPS  | BisRed vs. 15d-PGJ2                | SD  | 2   | n = 2 | 1-way ANOVA, Dunnett | 0.1836   | ns   |
|   |   | wt        | 15d-PGJ2 | gclc   | LPS  | BisRed vs. EC                      | SD  | 2   |       | 1-way ANOVA, Dunnett | 0.0039   | **   |
|   |   | nrf2 -/-  | EC       | gclc   | LPS  | BisRed vs. 15d-PGJ2                | SD  | 2   |       | 1-way ANOVA, Dunnett | 0.3133   | ns   |
|   |   | nrf2 -/-  | 15d-PGJ2 | gclc   | LPS  | BisRed vs. EC                      | SD  | 2   |       | 1-way ANOVA, Dunnett | 0.5486   | ns   |
|   |   | pparg -/- | EC       | gclc   | LPS  | BisRed vs. 15d-PGJ2                | SD  | 2   |       | 1-way ANOVA, Dunnett | 0.0042   | **   |
|   |   | pparg -/- | 15d-PGJ2 | gclc   | LPS  | BisRed vs. EC                      | SD  | 2   |       | 1-way ANOVA, Dunnett | 0.0002   | ***  |
|   |   | wt        | EC       | gsta3  | LPS  | BisRed vs. 15d-PGJ2                | SD  | 2   |       | 1-way ANOVA, Dunnett | 0.0372   | *    |
|   |   | wt        | 15d-PGJ2 | gsta3  | LPS  | BisRed vs. EC                      | SD  | 2   |       | 1-way ANOVA, Dunnett | 0.0156   | *    |
|   |   | nrf2 -/-  | EC       | gsta3  | LPS  | BisRed vs. 15d-PGJ2                | SD  | 2   |       | 1-way ANOVA, Dunnett | 0.253    | ns   |
|   |   | nrf2 -/-  | 15d-PGJ2 | gsta3  | LPS  | BisRed vs. EC                      | SD  | 2   |       | 1-way ANOVA, Dunnett | 0.1433   | ns   |
|   |   | pparg -/- | EC       | gsta3  | LPS  | BisRed vs. 15d-PGJ2                | SD  | 2   |       | 1-way ANOVA, Dunnett | 0.0417   | *    |
|   |   | pparg -/- | 15d-PGJ2 | gsta3  | LPS  | BisRed vs. EC                      | SD  | 2   |       | 1-way ANOVA, Dunnett | 0.0078   | **   |
| 4 | d | wt        | EC       | il6    | LPS  | R837 + solvent vs. R837 + EC       | SD  | 3,3 | n = 2 | 1-way ANOVA, Dunnett | < 0.0001 | **** |
|   |   | wt        | 15d-PGJ2 | il6    | LPS  | R837 + solvent vs. R837 + 15d-PGJ2 | SD  | 3,3 |       | 1-way ANOVA, Dunnett | < 0.0001 | **** |
|   |   | nrf2 -/-  | EC       | il6    | LPS  | R837 + solvent vs. R837 + EC       | SD  | 3,3 |       | 1-way ANOVA, Dunnett | 0.9639   | ns   |
|   |   | nrf2 -/-  | 15d-PGJ2 | il6    | LPS  | R837 + solvent vs. R837 + 15d-PGJ2 | SD  | 3,3 |       | 1-way ANOVA, Dunnett | 0.8219   | ns   |
|   |   | pparg -/- | EC       | il6    | LPS  | R837 + solvent vs. R837 + EC       | SD  | 2,3 |       | 1-way ANOVA, Dunnett | 0.0003   | ***  |
|   |   | pparg -/- | 15d-PGJ2 | il6    | LPS  | R837 + solvent vs. R837 + 15d-PGJ2 | SD  | 2,2 |       | 1-way ANOVA, Dunnett | 0.0018   | **   |
|   |   | wt        | EC       | il12   | LPS  | R837 + solvent vs. R837 + EC       | SD  | 3,3 |       | 1-way ANOVA, Dunnett | < 0.0001 | **** |
|   |   | wt        | 15d-PGJ2 | il12   | LPS  | R837 + solvent vs. R837 + 15d-PGJ2 | SD  | 3,3 |       | 1-way ANOVA, Dunnett | < 0.0001 | **** |
|   |   | nrf2 -/-  | EC       | il12   | LPS  | R837 + solvent vs. R837 + EC       | SD  | 3,3 |       | 1-way ANOVA, Dunnett | 0.9999   | ns   |
|   |   | nrf2 -/-  | 15d-PGJ2 | il12   | LPS  | R837 + solvent vs. R837 + 15d-PGJ2 | SD  | 3,3 |       | 1-way ANOVA, Dunnett | 0.7874   | ns   |
|   |   | pparg -/- | EC       | il12   | LPS  | R837 + solvent vs. R837 + EC       | SD  | 2,3 |       | 1-way ANOVA, Dunnett | < 0.0001 | **** |

|          |   |              |          |                    |          |                                    |     |        |       |                             |          |      |
|----------|---|--------------|----------|--------------------|----------|------------------------------------|-----|--------|-------|-----------------------------|----------|------|
|          |   | pparg -/-    | 15d-PGJ2 | il12               | LPS      | R837 + solvent vs. R837 + 15d-PGJ2 | SD  | 2,2    |       | 1-way ANOVA, Dunnett        | < 0.0001 | **** |
| 4        | e | wt           | 15d-PGJ2 | ccl2               | R837     | R837 vs. R837 + PGJ2               | SEM | 2,3    | n = 3 | 1-way ANOVA, Dunnett        | < 0.0001 | **** |
|          |   | wt           | EC       | ccl2               | R837     | R837 vs. R837 + EC                 | SEM | 2,3    |       | 1-way ANOVA, Dunnett        | < 0.0001 | **** |
|          |   | wt           | 15d-PGJ2 | ccl3               | R837     | R837 vs. R837 + PGJ2               | SEM | 2,3    |       | 1-way ANOVA, Dunnett        | < 0.0001 | **** |
|          |   | wt           | EC       | ccl3               | R837     | R837 vs. R837 + EC                 | SEM | 2,3    |       | 1-way ANOVA, Dunnett        | 0.0003   | ***  |
|          |   | wt           | 15d-PGJ2 | ccl4               | R837     | R837 vs. R837 + PGJ2               | SEM | 2,3    |       | 1-way ANOVA, Dunnett        | 0.0005   | ***  |
|          |   | wt           | EC       | ccl4               | R837     | R837 vs. R837 + EC                 | SEM | 2,3    |       | 1-way ANOVA, Dunnett        | 0.0008   | ***  |
|          |   | wt           | 15d-PGJ2 | ccl5               | R837     | R837 vs. R837 + PGJ2               | SEM | 2,3    |       | 1-way ANOVA, Dunnett        | 0.0142   | *    |
|          |   | wt           | EC       | ccl5               | R837     | R837 vs. R837 + EC                 | SEM | 2,3    |       | 1-way ANOVA, Dunnett        | 0.0531   | ns   |
|          |   | wt           | 15d-PGJ2 | cxcl10             | R837     | R837 vs. R837 + PGJ2               | SEM | 2,3    |       | 1-way ANOVA, Dunnett        | 0.0003   | ***  |
|          |   | wt           | EC       | cxcl10             | R837     | R837 vs. R837 + EC                 | SEM | 2,3    |       | 1-way ANOVA, Dunnett        | 0.0005   | ***  |
|          |   | wt           | 15d-PGJ2 | cxcl1              | R837     | R837 vs. R837 + PGJ2               | SEM | 2,3    |       | 1-way ANOVA, Dunnett        | 0.0163   | *    |
|          |   | wt           | EC       | cxcl1              | R837     | R837 vs. R837 + EC                 | SEM | 2,3    |       | 1-way ANOVA, Dunnett        | 0.0523   | ns   |
|          |   | wt           | 15d-PGJ2 | cxcl2              | R837     | R837 vs. R837 + PGJ2               | SEM | 2,3    |       | 1-way ANOVA, Dunnett        | 0.0069   | **   |
|          |   | wt           | EC       | cxcl2              | R837     | R837 vs. R837 + EC                 | SEM | 2,3    |       | 1-way ANOVA, Dunnett        | 0.0042   | **   |
| 5        | b | wt           | EC       | adherent cell no   | LPS/GalN | EC vs DPPC                         | SEM | 92'109 | n = 2 | unpaired, two-tailed t-test | < 0.0001 | **** |
| 5        | c | wt           | EC       | adherent cell no   | LPS/GalN | EC vs DPPC                         | SEM | 10,14  | n = 2 | unpaired, two-tailed t-test | < 0.0001 | **** |
| 5        | d | wt           | EC       | lung tot no.       | LPS/GalN | DPPC vs EC                         | SEM | 7,6    | n = 2 | unpaired, two-tailed t-test | 0.0083   | **   |
|          |   | wt           | EC       | lung neutrophil no | LPS/GalN | DPPC vs EC                         | SEM | 7,6    |       | unpaired, two-tailed t-test | 0.0422   | *    |
| 5        | f | wt           | EC       | IL-6               | R837     | DPPC vs EC                         | SEM | 3      | n = 2 | unpaired, two-tailed t-test | < 0.0001 | **** |
| 5        | g | wt           | EC       | IL-12              | R837     | DPPC vs EC                         | SEM | 3      | n = 2 | unpaired, two-tailed t-test | < 0.0001 | **** |
| 7        | b | wt           | EC       | IL-6               | R837     | Solv vs. EC                        | SEM | 2      | n = 3 | 1-way ANOVA, Dunnett        | 0.0082   | **   |
|          |   | wt           | cEC      | IL-6               | R837     | Solv vs. cEC                       | SEM | 2      | n = 3 | 1-way ANOVA, Dunnett        | 0.0004   | ***  |
|          |   | wt           | EC       | IL-12              | R837     | Solv vs. EC                        | SEM | 2      |       | 1-way ANOVA, Dunnett        | 0.0023   | **   |
|          |   | wt           | cEC      | IL-12              | R837     | Solv vs. cEC                       | SEM | 2      |       | 1-way ANOVA, Dunnett        | 0.0006   | ***  |
| 7        | c | wt           | cEC      | hmox-1             | R837     | DPPC vs cEC                        | SD  | 3      | n = 3 | unpaired, two-tailed t-test | 0.0038   | **   |
|          |   | wt           | cEC      | nqo1               | R837     | DPPC vs cEC                        | SD  | 3      |       | unpaired, two-tailed t-test | 0.0204   | *    |
| 7        | f | wt           | cEC      | ccl2               | LPS      | 0 nM vs 500 nM                     | SD  | 2      | n = 3 | unpaired, two-tailed t-test | 0.0043   | **   |
|          |   | wt           | cEC      | ccl3               | LPS      | 0 nM vs 500 nM                     | SD  | 2      |       | unpaired, two-tailed t-test | 0.0141   | *    |
|          |   | wt           | cEC      | ccl4               | LPS      | 0 nM vs 500 nM                     | SD  | 2      |       | unpaired, two-tailed t-test | 0.0273   | *    |
|          |   | wt           | cEC      | ccl5               | LPS      | 0 nM vs 500 nM                     | SD  | 2      |       | unpaired, two-tailed t-test | 0.0083   | **   |
| 7        | g | wt           | EC       | lung cell no       | LPS/GalN | BisRed vs. EC                      | SD  | 6      | n = 2 | 1-way ANOVA, Dunnett        | < 0.0001 | **** |
|          |   | wt           | cEC      | lung cell no       | LPS/GalN | BisRed vs. cEC                     | SD  | 6      |       | 1-way ANOVA, Dunnett        | 0.0017   | **   |
|          |   | wt           | EC       | lung neutrophil no | LPS/GalN | BisRed vs. EC                      | SD  | 6      |       | 1-way ANOVA, Dunnett        | < 0.0001 | **** |
|          |   | wt           | cEC      | lung neutrophil no | LPS/GalN | BisRed vs. cEC                     | SD  | 6      |       | 1-way ANOVA, Dunnett        | < 0.0001 | **** |
|          |   | wt           | EC       | BAL cell no        | LPS/GalN | BisRed vs. EC                      | SD  | 6      |       | 1-way ANOVA, Dunnett        | < 0.0001 | **** |
|          |   | wt           | cEC      | BAL cell no        | LPS/GalN | BisRed vs. cEC                     | SD  | 6      |       | 1-way ANOVA, Dunnett        | < 0.0001 | **** |
|          |   | wt           | EC       | BAL neutrophils    | LPS/GalN | BisRed vs. EC                      | SD  | 6      |       | 1-way ANOVA, Dunnett        | < 0.0001 | **** |
|          |   | wt           | cEC      | BAL neutrophils    | LPS/GalN | BisRed vs. cEC                     | SD  | 6      |       | 1-way ANOVA, Dunnett        | < 0.0001 | **** |
| 7        | h | wt           | 15d-PGJ2 | IFNg               | gp61     | DPPC vs. 15d-PGJ2                  | SD  | 4,2    | n = 2 | 1-way ANOVA, Dunnett        | 0.9524   | ns   |
|          |   | wt           | PECPC    | IFNg               | gp61     | DPPC vs. PECPC                     | SD  | 4,2    |       | 1-way ANOVA, Dunnett        | 0.0067   | **   |
|          |   | wt           | EC       | IFNg               | gp61     | DPPC vs. EC                        | SD  | 4,2    |       | 1-way ANOVA, Dunnett        | 0.0005   | ***  |
|          |   | wt           | cEC      | IFNg               | gp61     | DPPC vs. cEC                       | SD  | 4,2    |       | 1-way ANOVA, Dunnett        | < 0.0001 | **** |
|          |   | wt           | 15d-PGJ2 | IL-4               | gp61     | DPPC vs. 15d-PGJ2                  | SD  | 4,2    |       | 1-way ANOVA, Dunnett        | 0.8152   | ns   |
|          |   | wt           | PECPC    | IL-4               | gp61     | DPPC vs. PECPC                     | SD  | 4,2    |       | 1-way ANOVA, Dunnett        | 0.9998   | ns   |
|          |   | wt           | EC       | IL-4               | gp61     | DPPC vs. EC                        | SD  | 4,2    |       | 1-way ANOVA, Dunnett        | 0.0144   | *    |
|          |   | wt           | cEC      | IL-4               | gp61     | DPPC vs. cEC                       | SD  | 4,2    |       | 1-way ANOVA, Dunnett        | < 0.0001 | **** |
| Suppl. 3 | a | wt / nrf2-/- |          | IL-6               | CpG      | wt vs nrf2-/-                      | SD  | 3      |       | unpaired, two-tailed t-test | 0.0059   | **   |

|          |   |              |             |       |      |                            |     |   |  |                             |          |      |
|----------|---|--------------|-------------|-------|------|----------------------------|-----|---|--|-----------------------------|----------|------|
|          |   | wt / nrf2-/- |             | IL-12 | CpG  | wt vs nrf2-/-              | SD  | 3 |  | unpaired, two-tailed t-test | < 0.0001 | **** |
|          |   | wt / nrf2-/- |             | IL-6  | R837 | wt vs nrf2-/-              | SD  | 3 |  | unpaired, two-tailed t-test | 0.0144   | *    |
|          |   | wt / nrf2-/- |             | IL-12 | R837 | wt vs nrf2-/-              | SD  | 3 |  | unpaired, two-tailed t-test | < 0.0001 | **** |
| Suppl. 4 |   | BAL wt       |             | hmx-1 | LPS  | DPPC vs. cEC               | SEM | 4 |  | 1-way ANOVA, Dunnett        | < 0.0001 | **** |
|          |   | BAL wt       |             | hmx-1 | LPS  | DPPC vs. EC                | SEM | 4 |  | 1-way ANOVA, Dunnett        | 0.0001   | ***  |
|          |   | BAL wt       |             | hmx-1 | LPS  | DPPC vs. PECPC             | SEM | 4 |  | 1-way ANOVA, Dunnett        | 0.0185   | *    |
|          |   | BAL wt       |             | nqo1  | LPS  | DPPC vs. cEC               | SEM | 4 |  | 1-way ANOVA, Dunnett        | < 0.0001 | **** |
|          |   | BAL wt       |             | nqo1  | LPS  | DPPC vs. EC                | SEM | 4 |  | 1-way ANOVA, Dunnett        | 0.0007   | ***  |
|          |   | BAL wt       |             | nqo1  | LPS  | DPPC vs. PECPC             | SEM | 4 |  | 1-way ANOVA, Dunnett        | 0.1701   | ns   |
|          |   | Lung wt      |             | hmx-1 | LPS  | DPPC vs. cEC               | SEM | 4 |  | 1-way ANOVA, Dunnett        | 0.0002   | ***  |
|          |   | Lung wt      |             | hmx-1 | LPS  | DPPC vs. EC                | SEM | 4 |  | 1-way ANOVA, Dunnett        | 0.0124   | *    |
|          |   | Lung wt      |             | hmx-1 | LPS  | DPPC vs. PECPC             | SEM | 4 |  | 1-way ANOVA, Dunnett        | 0.5654   | ns   |
|          |   | Lung wt      |             | nqo1  | LPS  | DPPC vs. cEC               | SEM | 4 |  | 1-way ANOVA, Dunnett        | 0.0004   | ***  |
|          |   | Lung wt      |             | nqo1  | LPS  | DPPC vs. EC                | SEM | 4 |  | 1-way ANOVA, Dunnett        | 0.0015   | **   |
|          |   | Lung wt      |             | nqo1  | LPS  | DPPC vs. PECPC             | SEM | 4 |  | 1-way ANOVA, Dunnett        | 0.0151   | *    |
| Suppl 5  | a | wt           | Lipoxin B4  | IL-6  | R837 | 0 $\mu$ M vs. 10 $\mu$ M   | SD  | 3 |  | 1-way ANOVA, Dunnett        | 0.3648   | ns   |
|          |   | wt           | Lipoxin B4  | IL-6  | R837 | 0 $\mu$ M vs. 5 $\mu$ M    | SD  | 3 |  | 1-way ANOVA, Dunnett        | 0.9993   | ns   |
|          |   | wt           | Lipoxin B4  | IL-6  | R837 | 0 $\mu$ M vs. 2.5 $\mu$ M  | SD  | 3 |  | 1-way ANOVA, Dunnett        | 0.9554   | ns   |
|          |   | wt           | Lipoxin B4  | IL-6  | R837 | 0 $\mu$ M vs. 1.25 $\mu$ M | SD  | 3 |  | 1-way ANOVA, Dunnett        | 0.9976   | ns   |
|          |   | wt           | 15d-PGJ2    | IL-6  | R837 | 0 $\mu$ M vs. 20 $\mu$ M   | SD  | 3 |  | 1-way ANOVA, Dunnett        | < 0.0001 | **** |
|          |   | wt           | 15d-PGJ2    | IL-6  | R837 | 0 $\mu$ M vs. 10 $\mu$ M   | SD  | 3 |  | 1-way ANOVA, Dunnett        | < 0.0001 | **** |
|          |   | wt           | 15d-PGJ2    | IL-6  | R837 | 0 $\mu$ M vs. 5 $\mu$ M    | SD  | 3 |  | 1-way ANOVA, Dunnett        | < 0.0001 | **** |
|          |   | wt           | 15d-PGJ2    | IL-6  | R837 | 0 $\mu$ M vs. 2.5 $\mu$ M  | SD  | 3 |  | 1-way ANOVA, Dunnett        | 0.0018   | **   |
|          |   | wt           | 15d-PGJ2    | IL-6  | R837 | 0 $\mu$ M vs. 1.25 $\mu$ M | SD  | 3 |  | 1-way ANOVA, Dunnett        | 0.9706   | ns   |
|          |   | wt           | EC          | IL-6  | R837 | 0 nM vs. 1.25 $\mu$ M      | SD  | 3 |  | 1-way ANOVA, Dunnett        | < 0.0001 | **** |
|          |   | wt           | EC          | IL-6  | R837 | 0 nM vs. 625 nM            | SD  | 3 |  | 1-way ANOVA, Dunnett        | < 0.0001 | **** |
|          |   | wt           | EC          | IL-6  | R837 | 0 nM vs. 313 nM            | SD  | 3 |  | 1-way ANOVA, Dunnett        | 0.0004   | ***  |
|          |   | wt           | EC          | IL-6  | R837 | 0 nM vs. 156 nM            | SD  | 3 |  | 1-way ANOVA, Dunnett        | 0.4883   | ns   |
|          |   | wt           | EC          | IL-6  | R837 | 0 nM vs. 78 nM             | SD  | 3 |  | 1-way ANOVA, Dunnett        | 0.2549   | ns   |
|          |   | wt           | EC          | IL-6  | R837 | 0 nM vs. 39 nM             | SD  | 3 |  | 1-way ANOVA, Dunnett        | 0.4558   | ns   |
|          |   | wt           | BisRed      | IL-6  | R837 | 0 $\mu$ M vs. 40 $\mu$ M   | SD  | 3 |  | 1-way ANOVA, Dunnett        | 0.0268   | *    |
|          |   | wt           | BisRed      | IL-6  | R837 | 0 $\mu$ M vs. 20 $\mu$ M   | SD  | 3 |  | 1-way ANOVA, Dunnett        | 0.0641   | ns   |
|          |   | wt           | BisRed      | IL-6  | R837 | 0 $\mu$ M vs. 10 $\mu$ M   | SD  | 3 |  | 1-way ANOVA, Dunnett        | 0.1431   | ns   |
|          |   | wt           | Resolvin D2 | IL-6  | R837 | 0 $\mu$ M vs. 10 $\mu$ M   | SD  | 3 |  | 1-way ANOVA, Dunnett        | 0.0504   | ns   |
|          |   | wt           | Resolvin D2 | IL-6  | R837 | 0 $\mu$ M vs. 5 $\mu$ M    | SD  | 3 |  | 1-way ANOVA, Dunnett        | > 0.9999 | ns   |
|          |   | wt           | Resolvin D2 | IL-6  | R837 | 0 $\mu$ M vs. 2.5 $\mu$ M  | SD  | 3 |  | 1-way ANOVA, Dunnett        | 0.9998   | ns   |
|          |   | wt           | Resolvin D2 | IL-6  | R837 | 0 $\mu$ M vs. 1.25 $\mu$ M | SD  | 3 |  | 1-way ANOVA, Dunnett        | 0.958    | ns   |
|          |   | wt           | PGI2        | IL-6  | R837 | 0 $\mu$ M vs. 20 $\mu$ M   | SD  | 3 |  | 1-way ANOVA, Dunnett        | 0.1782   | ns   |
|          |   | wt           | PGI2        | IL-6  | R837 | 0 $\mu$ M vs. 10 $\mu$ M   | SD  | 3 |  | 1-way ANOVA, Dunnett        | 0.0822   | ns   |
|          |   | wt           | PGI2        | IL-6  | R837 | 0 $\mu$ M vs. 5 $\mu$ M    | SD  | 3 |  | 1-way ANOVA, Dunnett        | 0.124    | ns   |
|          |   | wt           | PGI2        | IL-6  | R837 | 0 $\mu$ M vs. 2.5 $\mu$ M  | SD  | 3 |  | 1-way ANOVA, Dunnett        | 0.5139   | ns   |
|          |   | wt           | PGI2        | IL-6  | R837 | 0 $\mu$ M vs. 1.25 $\mu$ M | SD  | 3 |  | 1-way ANOVA, Dunnett        | 0.4043   | ns   |
|          |   | wt           | cEC         | IL-6  | R837 | 0 nM vs. 625 nM            | SD  | 3 |  | 1-way ANOVA, Dunnett        | < 0.0001 | **** |
|          |   | wt           | cEC         | IL-6  | R837 | 0 nM vs. 313 nM            | SD  | 3 |  | 1-way ANOVA, Dunnett        | < 0.0001 | **** |
|          |   | wt           | cEC         | IL-6  | R837 | 0 nM vs. 156 nM            | SD  | 3 |  | 1-way ANOVA, Dunnett        | 0.0007   | ***  |
|          |   | wt           | cEC         | IL-6  | R837 | 0 nM vs. 78 nM             | SD  | 3 |  | 1-way ANOVA, Dunnett        | 0.0587   | ns   |

|         |   |    |             |       |      |                            |    |   |  |                      |          |      |
|---------|---|----|-------------|-------|------|----------------------------|----|---|--|----------------------|----------|------|
|         |   | wt | cEC         | IL-6  | R837 | 0 nM vs. 39 nM             | SD | 3 |  | 1-way ANOVA, Dunnett | 0.9064   | ns   |
|         |   | wt | DPPC        | IL-6  | R837 | 0 $\mu$ M vs. 40 $\mu$ M   | SD | 3 |  | 1-way ANOVA, Dunnett | 0.0261   | *    |
|         |   | wt | DPPC        | IL-6  | R837 | 0 $\mu$ M vs. 20 $\mu$ M   | SD | 3 |  | 1-way ANOVA, Dunnett | 0.0703   | ns   |
|         |   | wt | DPPC        | IL-6  | R837 | 0 $\mu$ M vs. 10 $\mu$ M   | SD | 3 |  | 1-way ANOVA, Dunnett | 0.4182   | ns   |
| Suppl 5 | b | wt | Lipoxin B4  | IL-12 | R837 | 0 $\mu$ M vs. 10 $\mu$ M   | SD | 3 |  | 1-way ANOVA, Dunnett | 0.068    | ns   |
|         |   | wt | Lipoxin B4  | IL-12 | R837 | 0 $\mu$ M vs. 5 $\mu$ M    | SD | 3 |  | 1-way ANOVA, Dunnett | 0.9758   | ns   |
|         |   | wt | Lipoxin B4  | IL-12 | R837 | 0 $\mu$ M vs. 2.5 $\mu$ M  | SD | 3 |  | 1-way ANOVA, Dunnett | 0.9139   | ns   |
|         |   | wt | Lipoxin B4  | IL-12 | R837 | 0 $\mu$ M vs. 1.25 $\mu$ M | SD | 3 |  | 1-way ANOVA, Dunnett | 0.5986   | ns   |
|         |   | wt | 15d-PGJ2    | IL-12 | R837 | 0 $\mu$ M vs. 20 $\mu$ M   | SD | 3 |  | 1-way ANOVA, Dunnett | < 0.0001 | **** |
|         |   | wt | 15d-PGJ2    | IL-12 | R837 | 0 $\mu$ M vs. 10 $\mu$ M   | SD | 3 |  | 1-way ANOVA, Dunnett | < 0.0001 | **** |
|         |   | wt | 15d-PGJ2    | IL-12 | R837 | 0 $\mu$ M vs. 5 $\mu$ M    | SD | 3 |  | 1-way ANOVA, Dunnett | < 0.0001 | **** |
|         |   | wt | 15d-PGJ2    | IL-12 | R837 | 0 $\mu$ M vs. 2.5 $\mu$ M  | SD | 3 |  | 1-way ANOVA, Dunnett | < 0.0001 | **** |
|         |   | wt | 15d-PGJ2    | IL-12 | R837 | 0 $\mu$ M vs. 1.25 $\mu$ M | SD | 3 |  | 1-way ANOVA, Dunnett | 0.0003   | ***  |
|         |   | wt | EC          | IL-12 | R837 | 0 nM vs. 1.25 $\mu$ M      | SD | 3 |  | 1-way ANOVA, Dunnett | < 0.0001 | **** |
|         |   | wt | EC          | IL-12 | R837 | 0 nM vs. 625 nM            | SD | 3 |  | 1-way ANOVA, Dunnett | < 0.0001 | **** |
|         |   | wt | EC          | IL-12 | R837 | 0 nM vs. 313 nM            | SD | 3 |  | 1-way ANOVA, Dunnett | < 0.0001 | **** |
|         |   | wt | EC          | IL-12 | R837 | 0 nM vs. 156 nM            | SD | 3 |  | 1-way ANOVA, Dunnett | < 0.0001 | **** |
|         |   | wt | EC          | IL-12 | R837 | 0 nM vs. 78 nM             | SD | 3 |  | 1-way ANOVA, Dunnett | 0.0018   | **   |
|         |   | wt | EC          | IL-12 | R837 | 0 nM vs. 39 nM             | SD | 3 |  | 1-way ANOVA, Dunnett | 0.9769   | ns   |
|         |   | wt | BisRed      | IL-12 | R837 | 0 $\mu$ M vs. 40 $\mu$ M   | SD | 3 |  | 1-way ANOVA, Dunnett | 0.135    | ns   |
|         |   | wt | BisRed      | IL-12 | R837 | 0 $\mu$ M vs. 20 $\mu$ M   | SD | 3 |  | 1-way ANOVA, Dunnett | 0.0138   | *    |
|         |   | wt | BisRed      | IL-12 | R837 | 0 $\mu$ M vs. 10 $\mu$ M   | SD | 3 |  | 1-way ANOVA, Dunnett | 0.1048   | ns   |
|         |   | wt | Resolvin D2 | IL-12 | R837 | 0 $\mu$ M vs. 10 $\mu$ M   | SD | 3 |  | 1-way ANOVA, Dunnett | < 0.0001 | **** |
|         |   | wt | Resolvin D2 | IL-12 | R837 | 0 $\mu$ M vs. 5 $\mu$ M    | SD | 3 |  | 1-way ANOVA, Dunnett | 0.0608   | ns   |
|         |   | wt | Resolvin D2 | IL-12 | R837 | 0 $\mu$ M vs. 2.5 $\mu$ M  | SD | 3 |  | 1-way ANOVA, Dunnett | 0.9168   | ns   |
|         |   | wt | Resolvin D2 | IL-12 | R837 | 0 $\mu$ M vs. 1.25 $\mu$ M | SD | 3 |  | 1-way ANOVA, Dunnett | 0.9999   | ns   |
|         |   | wt | PGI2        | IL-12 | R837 | 0 $\mu$ M vs. 20 $\mu$ M   | SD | 3 |  | 1-way ANOVA, Dunnett | 0.6035   | ns   |
|         |   | wt | PGI2        | IL-12 | R837 | 0 $\mu$ M vs. 10 $\mu$ M   | SD | 3 |  | 1-way ANOVA, Dunnett | 0.5383   | ns   |
|         |   | wt | PGI2        | IL-12 | R837 | 0 $\mu$ M vs. 5 $\mu$ M    | SD | 3 |  | 1-way ANOVA, Dunnett | 0.4834   | ns   |
|         |   | wt | PGI2        | IL-12 | R837 | 0 $\mu$ M vs. 2.5 $\mu$ M  | SD | 3 |  | 1-way ANOVA, Dunnett | > 0.9999 | ns   |
|         |   | wt | PGI2        | IL-12 | R837 | 0 $\mu$ M vs. 1.25 $\mu$ M | SD | 3 |  | 1-way ANOVA, Dunnett | 0.9979   | ns   |
|         |   | wt | cEC         | IL-12 | R837 | 0 nM vs. 625 nM            | SD | 3 |  | 1-way ANOVA, Dunnett | < 0.0001 | **** |
|         |   | wt | cEC         | IL-12 | R837 | 0 nM vs. 313 nM            | SD | 3 |  | 1-way ANOVA, Dunnett | < 0.0001 | **** |
|         |   | wt | cEC         | IL-12 | R837 | 0 nM vs. 156 nM            | SD | 3 |  | 1-way ANOVA, Dunnett | < 0.0001 | **** |
|         |   | wt | cEC         | IL-12 | R837 | 0 nM vs. 78 nM             | SD | 3 |  | 1-way ANOVA, Dunnett | < 0.0001 | **** |
|         |   | wt | cEC         | IL-12 | R837 | 0 nM vs. 39 nM             | SD | 3 |  | 1-way ANOVA, Dunnett | 0.002    | **   |
|         |   | wt | DPPC        | IL-12 | R837 | 0 $\mu$ M vs. 40 $\mu$ M   | SD | 3 |  | 1-way ANOVA, Dunnett | 0.4789   | ns   |
|         |   | wt | DPPC        | IL-12 | R837 | 0 $\mu$ M vs. 20 $\mu$ M   | SD | 3 |  | 1-way ANOVA, Dunnett | 0.6268   | ns   |
|         |   | wt | DPPC        | IL-12 | R837 | 0 $\mu$ M vs. 10 $\mu$ M   | SD | 3 |  | 1-way ANOVA, Dunnett | 0.8151   | ns   |
| Suppl 6 |   | wt | EC          | Gclc  | R837 | BisRed vs. EC              | SD | 2 |  | 1-way ANOVA, Sidak   | < 0.0001 | **** |
|         |   | wt | cEC         | Gclc  | R837 | BisRed vs. cEC             | SD | 2 |  | 1-way ANOVA, Sidak   | < 0.0001 | **** |
|         |   | wt | BisRed      | Gclc  | R837 | BisRed vs. 15d-PGJ2        | SD | 2 |  | 1-way ANOVA, Sidak   | < 0.0001 | **** |
|         |   | wt | 15d-PGJ2    | Gclc  | R837 | BisRed vs. PGI2            | SD | 2 |  | 1-way ANOVA, Sidak   | 0.8687   | ns   |
|         |   | wt | Lipoxin B4  | Gclc  | R837 | BisRed vs. LB4             | SD | 2 |  | 1-way ANOVA, Sidak   | > 0.9999 | ns   |
|         |   | wt | Resolvin D2 | Gclc  | R837 | BisRed vs. PD2             | SD | 2 |  | 1-way ANOVA, Sidak   | > 0.9999 | ns   |
|         |   | wt | solvent     | Gclc  | R837 | BisRed vs. solvent         | SD | 2 |  | 1-way ANOVA, Sidak   | > 0.9999 | ns   |



|          |   |    |             |        |      |                     |     |     |  |                      |          |      |
|----------|---|----|-------------|--------|------|---------------------|-----|-----|--|----------------------|----------|------|
|          |   | wt | EC          | Gsta3  | R837 | BisRed vs. EC       | SD  | 2   |  | 1-way ANOVA, Sidak   | < 0.0001 | **** |
|          |   | wt | cEC         | Gsta3  | R837 | BisRed vs. cEC      | SD  | 2   |  | 1-way ANOVA, Sidak   | < 0.0001 | **** |
|          |   | wt | BisRed      | Gsta3  | R837 | BisRed vs. 15d-PGJ2 | SD  | 2   |  | 1-way ANOVA, Sidak   | 0.0029   | **   |
|          |   | wt | 15d-PGJ2    | Gsta3  | R837 | BisRed vs. PGI2     | SD  | 2   |  | 1-way ANOVA, Sidak   | 0.5302   | ns   |
|          |   | wt | Lipoxin B4  | Gsta3  | R837 | BisRed vs. LB4      | SD  | 2   |  | 1-way ANOVA, Sidak   | 0.9376   | ns   |
|          |   | wt | Resolvin D2 | Gsta3  | R837 | BisRed vs. PD2      | SD  | 2   |  | 1-way ANOVA, Sidak   | 0.8764   | ns   |
|          |   | wt | solvent     | Gsta3  | R837 | BisRed vs. solvent  | SD  | 2   |  | 1-way ANOVA, Sidak   | 0.9985   | ns   |
|          |   | wt | EC          | Gsta3  | R837 | BisRed vs. EC       | SD  | 2   |  | 1-way ANOVA, Sidak   | < 0.0001 | **** |
|          |   | wt | cEC         | Gsta3  | R837 | BisRed vs. cEC      | SD  | 2   |  | 1-way ANOVA, Sidak   | < 0.0001 | **** |
|          |   | wt | BisRed      | Gsta3  | R837 | BisRed vs. 15d-PGJ2 | SD  | 2   |  | 1-way ANOVA, Sidak   | < 0.0001 | **** |
|          |   | wt | 15d-PGJ2    | Gsta3  | R837 | BisRed vs. PGI2     | SD  | 2   |  | 1-way ANOVA, Sidak   | 0.8687   | ns   |
|          |   | wt | Lipoxin B4  | Gsta3  | R837 | BisRed vs. LB4      | SD  | 2   |  | 1-way ANOVA, Sidak   | > 0.9999 | ns   |
|          |   | wt | Resolvin D2 | Gsta3  | R837 | BisRed vs. PD2      | SD  | 2   |  | 1-way ANOVA, Sidak   | > 0.9999 | ns   |
|          |   | wt | solvent     | Gsta3  | R837 | BisRed vs. solvent  | SD  | 2   |  | 1-way ANOVA, Sidak   | > 0.9999 | ns   |
|          |   | wt | EC          | Il12b  | R837 | BisRed vs. EC       | SEM | 2   |  | 1-way ANOVA, Dunnett | 0.0036   | **   |
|          |   | wt | cEC         | Il12b  | R837 | BisRed vs. cEC      | SEM | 2   |  | 1-way ANOVA, Dunnett | 0.003    | **   |
|          |   | wt | EC          | Il12a  | R837 | BisRed vs. EC       | SEM | 2   |  | 1-way ANOVA, Dunnett | 0.0376   | *    |
|          |   | wt | cEC         | Il12a  | R837 | BisRed vs. cEC      | SEM | 2   |  | 1-way ANOVA, Dunnett | 0.0342   | *    |
|          |   | wt | EC          | Il23   | R837 | BisRed vs. EC       | SEM | 2   |  | 1-way ANOVA, Dunnett | 0.076    | ns   |
|          |   | wt | cEC         | Il23   | R837 | BisRed vs. cEC      | SEM | 2   |  | 1-way ANOVA, Dunnett | 0.0653   | ns   |
|          |   | wt | EC          | Il6    | R837 | BisRed vs. EC       | SEM | 2   |  | 1-way ANOVA, Dunnett | < 0.0001 | **** |
|          |   | wt | cEC         | Il6    | R837 | BisRed vs. cEC      | SEM | 2   |  | 1-way ANOVA, Dunnett | < 0.0001 | **** |
|          |   | wt | EC          | Tnf    | R837 | BisRed vs. EC       | SEM | 2   |  | 1-way ANOVA, Dunnett | 0.0016   | **   |
|          |   | wt | cEC         | Tnf    | R837 | BisRed vs. cEC      | SEM | 2   |  | 1-way ANOVA, Dunnett | 0.0004   | ***  |
|          |   | wt | EC          | Il10   | R837 | BisRed vs. EC       | SEM | 2   |  | 1-way ANOVA, Dunnett | 0.7574   | ns   |
|          |   | wt | cEC         | Il10   | R837 | BisRed vs. cEC      | SEM | 2   |  | 1-way ANOVA, Dunnett | 0.4651   | ns   |
|          |   | wt | EC          | hmox-1 | R837 | BisRed vs. EC       | SEM | 2   |  | 1-way ANOVA, Dunnett | < 0.0001 | **** |
|          |   | wt | cEC         | hmox-1 | R837 | BisRed vs. cEC      | SEM | 2   |  | 1-way ANOVA, Dunnett | < 0.0001 | **** |
|          |   | wt | EC          | nqo1   | R837 | BisRed vs. EC       | SEM | 2   |  | 1-way ANOVA, Dunnett | 0.0003   | ***  |
|          |   | wt | cEC         | nqo1   | R837 | BisRed vs. cEC      | SEM | 2   |  | 1-way ANOVA, Dunnett | 0.0011   | **   |
|          |   | wt | EC          | Gclc   | R837 | BisRed vs. EC       | SEM | 2   |  | 1-way ANOVA, Dunnett | 0.0018   | **   |
|          |   | wt | cEC         | Gclc   | R837 | BisRed vs. cEC      | SEM | 2   |  | 1-way ANOVA, Dunnett | 0.0019   | **   |
| Suppl 10 | b | wt | EC          | Gsta3  | R837 | BisRed vs. EC       | SEM | 2   |  | 1-way ANOVA, Dunnett | 0.0002   | ***  |
|          |   | wt | cEC         | Gsta3  | R837 | BisRed vs. cEC      | SEM | 2   |  | 1-way ANOVA, Dunnett | 0.0004   | ***  |
|          |   | wt | cEC         | Gsta3  | R837 | BisRed vs. cEC      | SEM | 3,4 |  | 1-way ANOVA, Dunnett | < 0.0001 | **** |
|          |   | wt | EC          | Gsta3  | R837 | BisRed vs. EC       | SEM | 3,4 |  | 1-way ANOVA, Dunnett | 0.0019   | **   |
|          |   | wt | PECPC       | Gsta3  | R837 | BisRed vs. PECPC    | SEM | 3,4 |  | 1-way ANOVA, Dunnett | 0.0134   | *    |
|          |   | wt | DPPC        | Gsta3  | R837 | BisRed vs. DPPC     | SEM | 3,4 |  | 1-way ANOVA, Dunnett | > 0.9999 | ns   |
|          |   | wt | cEC         | nqo1   | R837 | BisRed vs. cEC      | SEM | 3,4 |  | 1-way ANOVA, Dunnett | 0.0031   | **   |
|          |   | wt | EC          | nqo1   | R837 | BisRed vs. EC       | SEM | 3,4 |  | 1-way ANOVA, Dunnett | 0.0179   | *    |
|          |   | wt | PECPC       | nqo1   | R837 | BisRed vs. PECPC    | SEM | 3,4 |  | 1-way ANOVA, Dunnett | 0.0574   | ns   |
|          |   | wt | DPPC        | nqo1   | R837 | BisRed vs. DPPC     | SEM | 3,4 |  | 1-way ANOVA, Dunnett | > 0.9999 | ns   |
